# Supplementary material for: Biomimetic caged platinum catalyst for hydrosilylation reaction with high site selectivity
Source: PubMed Central journal article supplement (PMC7782696; doi:10.1038/s41467-020-20233-w), 2021-01-04
Supplement: 41467_2020_20233_MOESM1_ESM.pdf [file 41467_2020_20233_MOESM1_ESM.pdf]

## 1 **Supplementary Information**

2

### 3 **Biomimetic Caged Platinum Catalyst for Hydrosilylation Reaction**

#### 4 **with High Site Selectivity**

5 Ganghuo Pan<sup>1</sup>, Chunhua Hu<sup>2</sup>, Song Hong<sup>3</sup>, Huaping Li<sup>1</sup>, Dongdong Yu<sup>1</sup>, Chengqian  
6 Cui<sup>1</sup>, Qiaosheng Li<sup>1</sup>, Nianjie Liang<sup>1</sup>, Ying Jiang<sup>1</sup>, Lirong Zheng<sup>5</sup>, Lei Jiang<sup>1</sup>, Yuzhou  
7 Liu<sup>1,4\*</sup>

8 1. School of Chemistry, Beihang University, Beijing, 100191, PR China

9 2. The Department of Chemistry, New York University, 100 Washington Square  
10 East, New York, New York, 10003-6688, USA

11 3. Center for Instrumental Analysis, Beijing University of Chemical Technology,  
12 Chaoyang, Beijing 100029, China

13 4. Beijing Advanced Innovation Center for Biomedical Engineering, Beihang  
14 University, Beijing 100191, PR China

15 5. Beijing Synchrotron Radiation Facility, Institute of High Energy Physics, Chinese  
16 Academy of Sciences, Beijing 100049, P.R. China

17 \*Correspondence to: liuyuzhou@buaa.edu.cn

### 18 **Supplementary Section 1 Synthesis**

19 **1-1:** Synthesis of hexaphenylbenzene (**HPB**)<sup>1</sup>.

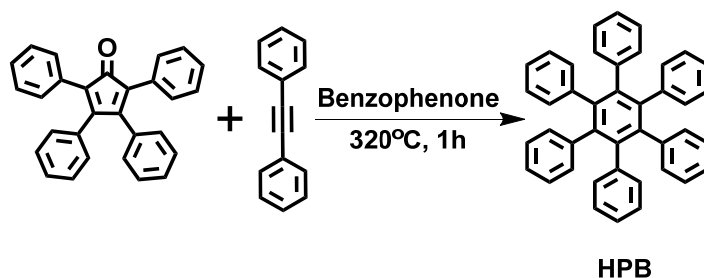

20

### 21 **Supplementary Figure 1: Synthesis of HPB**

22 A mixture of tetraphenylcyclopentadienone (8.0 g, 21.0 mmol),  
23 diphenylacetylene (8.0 g, 43.0 mmol), and benzophenone (40 g) was heated at 320 °C

24 for 1 h in a one-neck round-bottom flask attached to an air condenser. The reaction  
25 mixture was cooled to room temperature to give a crystalline precipitate, which was  
26 filtered, washed with benzene, and dried in a vacuum oven at 80 °C overnight. The  
27 product was purified further by recrystallization from diphenyl ether, filtered, and  
28 washed with hot benzene to give 8.1 g **HPB** (72%). <sup>1</sup>H NMR (300 MHz, CDCl<sub>3</sub>) δ  
29 6.84 (br, 30H), HRMS (ESI TOF, positive) m/z calcd. for C<sub>42</sub>H<sub>31</sub> [M+H]<sup>+</sup> :  
30 535.24258, found: 535.23772.

31 **1-2: Synthesis of hexakis(4-bromophenyl) benzene (**HBB**)**<sup>2</sup>.

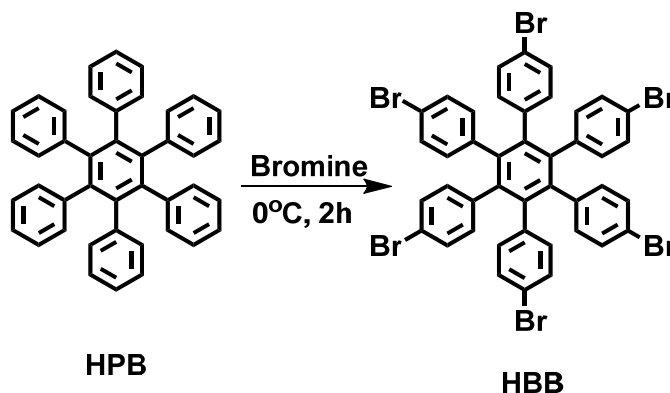

33 **Supplementary Figure 2: Synthesis of **HBB****

34 After dropwise addition of bromine (400.0 mL, 8 mol) into hexaphenylbenzene  
35 (100 g, 187 mmol) at 0 °C, the mixture was vigorously stirred for 2 h at rt, and then  
36 poured into ice-cooled aqueous solution of Na<sub>2</sub>SO<sub>3</sub>. After stirring overnight, the  
37 resulting precipitation was filtered and washed with water, acetone, and CH<sub>2</sub>Cl<sub>2</sub>  
38 successively to afford **HBB** (153 g, 81%) as a white solid. Refer to Supplementary Fig.  
39 6 for <sup>1</sup>H-NMR spectrum and Supplementary Fig. 7 for MALDI-TOF-MS  
40 spectrum. <sup>1</sup>H NMR (400 MHz, CDCl<sub>3</sub>) δ 7.07-7.04 (d, 12H), 6.62–6.60 (d, 12H);  
41 MALDI-TOF-MS m/z calcd. for C<sub>42</sub>H<sub>24</sub>Br<sub>6</sub> [M]<sup>+</sup>: 1007.6917, found:1007.7993.

42 **1-3: Synthesis of TBTO**<sup>3</sup>.

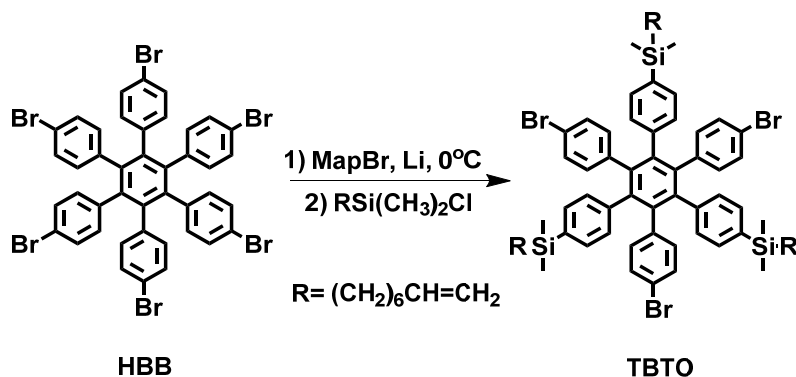

43

44 **Supplementary Figure 3: Synthesis of TBTO**

45 To granular lithium (1.86 g, 0.268 mol) was added the solution of  
 46 *p*-(dimethylamino)benzene (MapBr) (26.8 g, 0.134 mol) in Et<sub>2</sub>O (100 mL) dropwise  
 47 in 10 min. During the addition, the solution spontaneously refluxed. After the addition,  
 48 the mixture was refluxed for 1 h. Then THF (200 mL) and compound **HBB** (30.0 g,  
 49 29.8 mmol) were added at 0 °C. The mixture was stirred for 20 min at 0 °C and  
 50 transferred to another reaction vessel containing CH<sub>2</sub>=CH(CH<sub>2</sub>)<sub>6</sub>Si(CH<sub>3</sub>)<sub>2</sub>Cl (54.8g  
 51 0.268 mol) at 0 °C, and then the solvent was removed in vacuum. After the addition  
 52 of water (100 mL) and CHCl<sub>3</sub> (100 mL), the organic layer was separated. The  
 53 aqueous layer was extracted with CHCl<sub>3</sub> (100 mL×3) and the combined extracts were  
 54 washed twice with aq. HCl (1 M). The resulting organic solution was dried over  
 55 anhydrous MgSO<sub>4</sub>, and filtered. Then the solvent was removed in vacuum and the  
 56 product was purified by flash chromatography on silica gel with  
 57 dichloromethane/hexanes (2:8) mixture as the eluent to afford product of **TBTO** as a  
 58 white solid 28.1g (74%). Refer to Supplementary Fig. 8 for NMR spectrum. <sup>1</sup>H NMR  
 59 (400 MHz, CDCl<sub>3</sub>) δ 0.13 (s, 18H), 0.60-0.54 (t, 6H), 1.35-1.12 (m, 24H), 2.07-2.00  
 60 (q, 6H), 5.02-4.91 (m, 6H), 5.88-5.75 (m, 3H), 6.64-6.61 (d, 6H), 6.73-6.70 (d, 6H),  
 61 6.95-6.93 (d, 6H), 7.03-7.00 (d, 6H); MALDI-TOF-MS m/z calcd. for C<sub>72</sub>H<sub>88</sub>Br<sub>3</sub>Si<sub>3</sub>  
 62 [M+H]<sup>+</sup>:1275.37235, found:1275.37641.

63 **1-4: Synthesis of H3L8-Me<sup>4</sup>.**

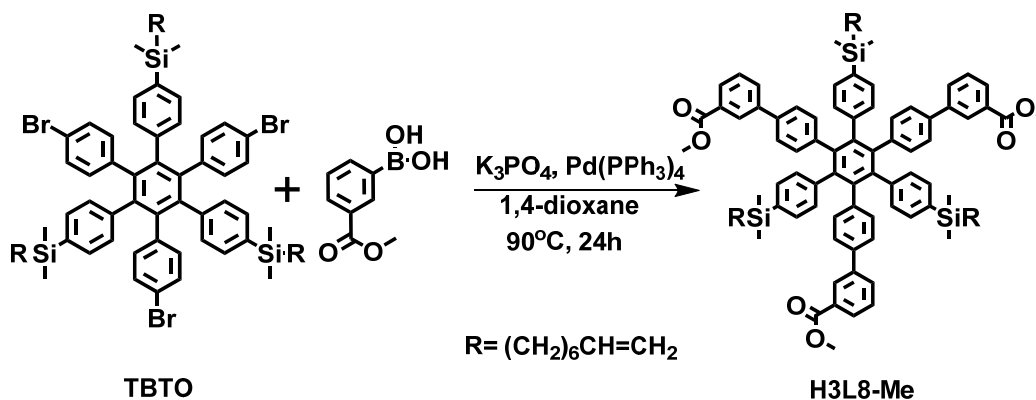

65 **Supplementary Figure 4: Synthesis of H3L8-Me**

66 **TBTO** (2 g, 1.5mmol) , benzene-3-carboxyethylboronic acid (0.65 g, 5  
 67 mmol), and  $\text{K}_3\text{PO}_4$  (2.0 g, 10.0 mmol) were added to 1,4-dioxane (50 mL), and the  
 68 mixture was de-aerated under  $\text{N}_2$ .  $\text{Pd}(\text{PPh}_3)_4$  (0.1 g, 0.08 mmol) was added to the  
 69 reaction mixture with stirring, and then the mixture heated at  $90^\circ\text{C}$  for 24h under  $\text{N}_2$ .  
 70 The resultant mixture was evaporated to dryness and taken up in  $\text{CHCl}_3$  which had  
 71 been dried over  $\text{MgSO}_4$ . The  $\text{CHCl}_3$  solution was evaporated to dryness and the  
 72 residue was purified by silica gel column chromatography, to give **H3L8-Me** 1.9g  
 73 (85%). Refer to Supplementary Fig. 9 for NMR spectrum.  $^1\text{H}$  NMR (400 MHz,  
 74  $\text{CDCl}_3$ )  $\delta$  0.07 (s, 18H), 0.53-0.51 (br, 6H), 1.25-1.07 (m, 24H), 1.95-1.88 (q, 6H),  
 75 3.90 (s, 9H), 4.97-4.88 (m, 6H), 5.82-5.68 (m, 3H), 6.86-6.84 (d, 6H), 6.92-6.89 (d,  
 76 6H) , 7.02-6.99 (d, 6H), 7.14-7.11 (d, 6H), 7.42-7.37 (t, 3H), 7.60-7.57 (d, 3H) ,  
 77 7.94-7.91 (d, 3H), 8.09 (s, 3H); HRMS (ESI TOF, positive) m/z calcd. for  
 78  $\text{C}_{96}\text{H}_{108}\text{O}_6\text{Si}_3\text{Na}$   $[\text{M}+\text{Na}]^+$  : 1464.73850, found: 1464.73581.

79 **1-5: Synthesis of L1**

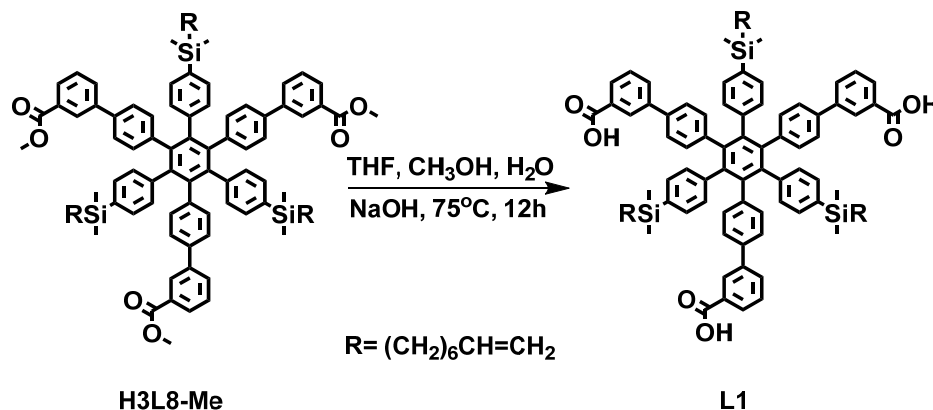

80

81 **Supplementary Figure 5: Synthesis of L1**

82 **H3L8-Me** (1.9 g) was hydrolyzed by refluxing in the solution of 2 M aqueous  
 83 NaOH(10 ml)/ THF (10 ml)/ CH<sub>3</sub>OH (10 ml) for about 12h followed by acidification  
 84 with 37% HCl to afford **L1**. The crude product was recrystallized from DMF/H<sub>2</sub>O.  
 85 Refer to Supplementary Fig. 10 for <sup>1</sup>H NMR spectrum and Supplementary Fig. 11 for  
 86 <sup>13</sup>C NMR spectrum. <sup>1</sup>H NMR (400 MHz, DMSO-d<sub>6</sub>) δ 0.00 (s, 6H), 0.40-0.36 (br,  
 87 6H), 1.06-0.89 (m, 24H), 1.85-1.78 (q, 6H), 4.95-4.86 (m, 6H), 5.76-5.63 (m, 3H),  
 88 7.02-6.93 (m, 18H), 7.13-7.11 (d, 6H), 7.26-7.21 (t, 3H), 7.38-7.35 (d, 3H), 7.76-7.74  
 89 (d, 3H), 7.95 (s, 3H), 13.24(br,3H); <sup>13</sup>C NMR (100MHz, DMSO-d<sub>6</sub>) δ 169.34, 143.44,  
 90 142.76, 142.24, 141.98, 141.80, 141.52, 139.61, 137.92, 134.34, 134.16, 133.09,  
 91 130.58, 130.38, 129.83, 127.31, 116.94, 35.96, 35.14, 30.91, 30.71, 25.76, 20.44,  
 92 18.01, 0.50; <sup>29</sup>Si NMR (120MHz, THF) δ -3.114. HRMS (ESI TOF, negative) m/z  
 93 calcd. for C<sub>93</sub>H<sub>101</sub>O<sub>6</sub>Si<sub>3</sub> [M-H]<sup>-</sup>: 1398.69450, found: 1398.68861. Element analysis  
 94 (EA): C, 79.53; H, 7.21 (calcd.: C, 79.78; H, 7.34).

95

96

97 **Supplementary Section 2: Tables and Figures**

|                                      |                                                                                                       |
|--------------------------------------|-------------------------------------------------------------------------------------------------------|
| Empirical formula                    | C <sub>780</sub> H <sub>876</sub> Cu <sub>12</sub> N <sub>12</sub> O <sub>60</sub> Si <sub>24</sub>   |
| Formula weight                       | 12903.02                                                                                              |
| Temperature                          | 100 K                                                                                                 |
| Wavelength                           | 0.60000 Å                                                                                             |
| Crystal system                       | trigonal                                                                                              |
| Space group                          | R -3                                                                                                  |
| Unit cell dimensions                 | a = 47.215(7) Å $\alpha$ = 90°.<br>b = 47.215(7) Å $\beta$ = 90°.<br>c = 68.829(14) Å $\gamma$ = 120° |
| Volume                               | 132879(46) Å <sup>3</sup>                                                                             |
| Z                                    | 6                                                                                                     |
| Density                              | 0.961 g/cm <sup>3</sup>                                                                               |
| Crystal size                         | 0.3 x 0.27x 0.1 mm <sup>3</sup>                                                                       |
| Theta range for data collection      | 1.518 to 25.181°.                                                                                     |
| Index [h,k,l]max                     | 56,49,81                                                                                              |
| Reflections collected                | 52407                                                                                                 |
| Independent reflections              | 79108 [R(int) = 0.0259]                                                                               |
| Completeness to theta = 25.181°      | 99.6%                                                                                                 |
| Absorption correction                | Empirical                                                                                             |
| Refinement method                    | Full-matrix least-squares on F <sup>2</sup>                                                           |
| Goodness-of-fit on F <sup>2</sup>    | 1.327                                                                                                 |
| Final R indices [ $I > 2\sigma(I)$ ] | R <sub>1</sub> = 0.1116, wR <sub>2</sub> = 0.3071                                                     |
| R indices (all data)                 | R <sub>1</sub> = 0.0991, wR <sub>2</sub> = 0.2868                                                     |

98 **Supplementary Table 1.** Crystal data and structure refinement data for **MOP1**.

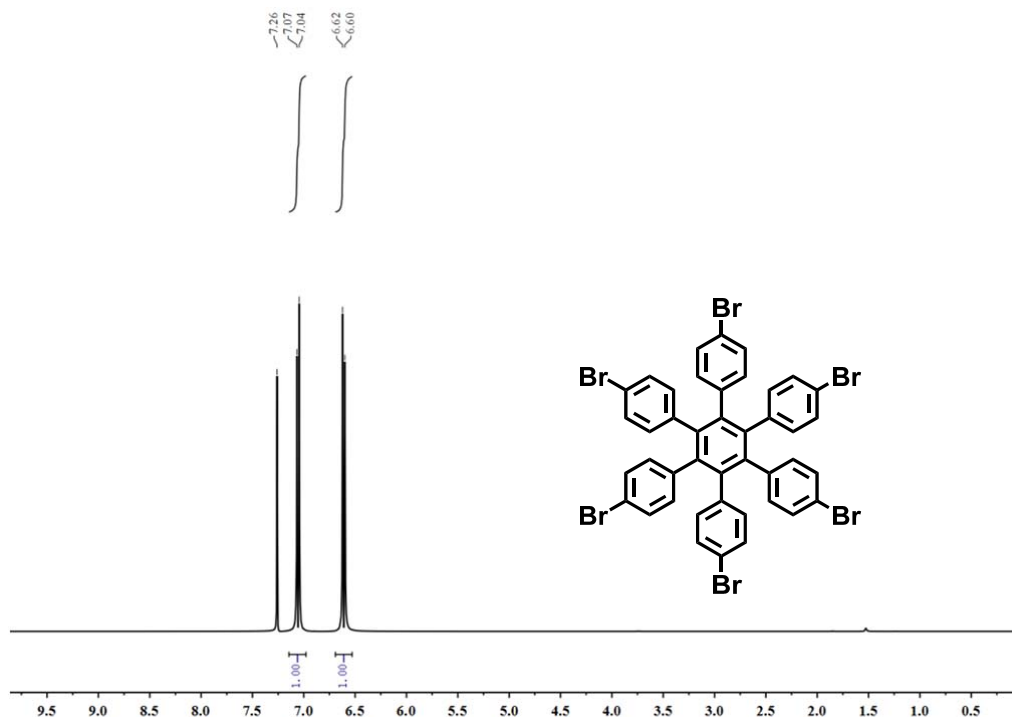

99

100 **Supplementary Figure 6. <sup>1</sup>H-NMR of HBB**

101

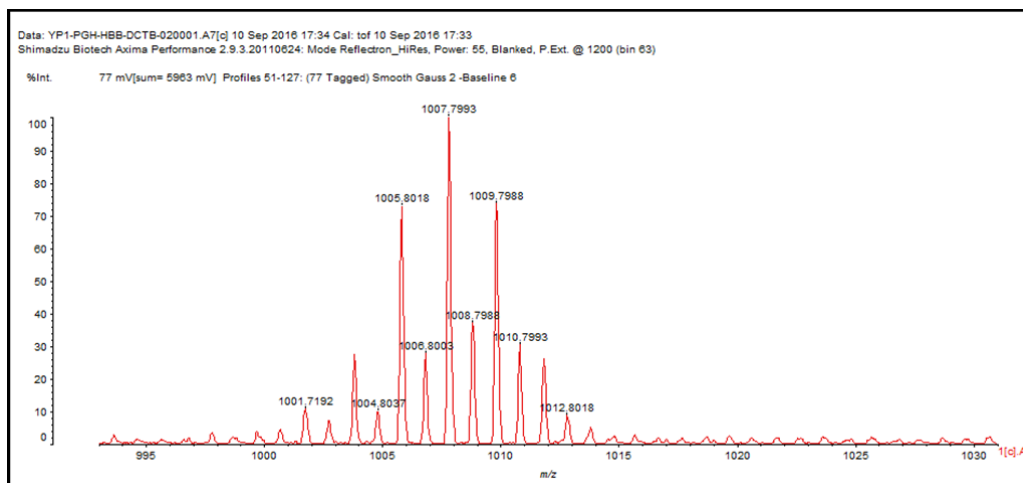

102

103 **Supplementary Figure 7. MALDI-TOF-MS of HBB**

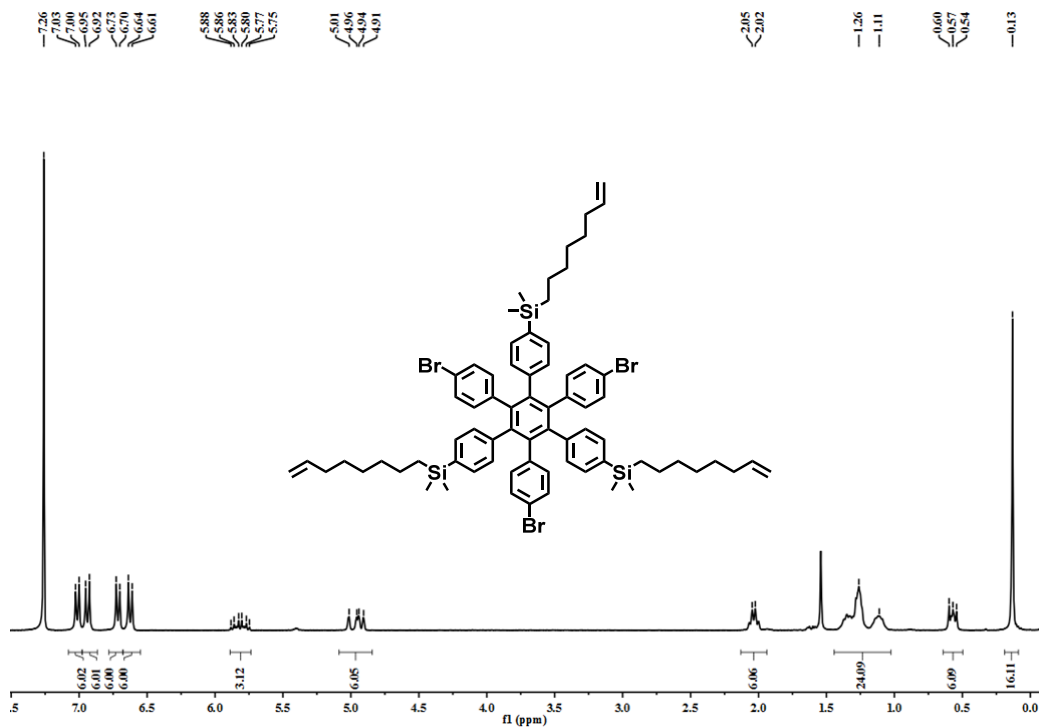

104

105 **Supplementary Figure 8. <sup>1</sup>H-NMR of TBTSi-O**

106

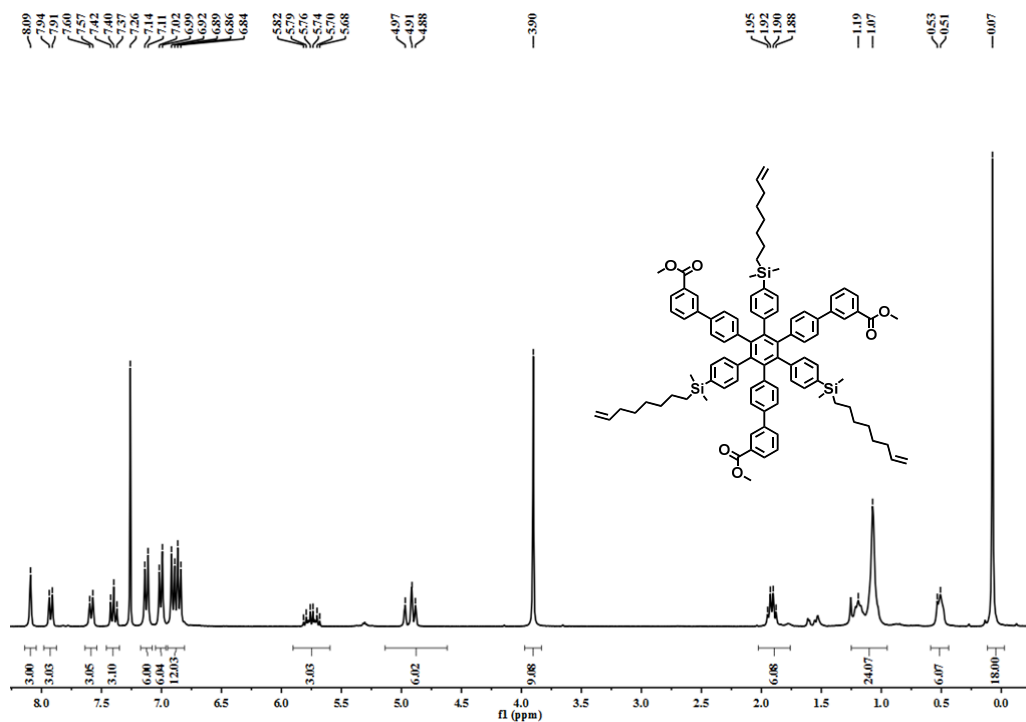

107

108 **Supplementary Figure 9. <sup>1</sup>H-NMR of H3L8-Me**



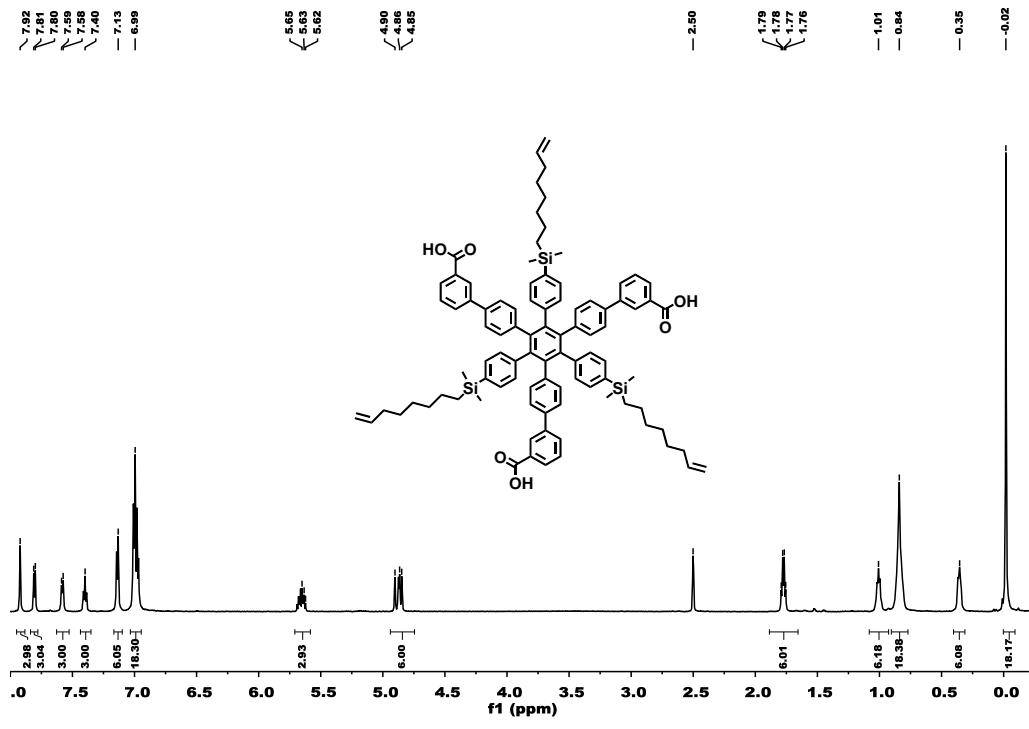

109

110 **Supplementary Figure 10.**  $^1\text{H-NMR}$  of L1

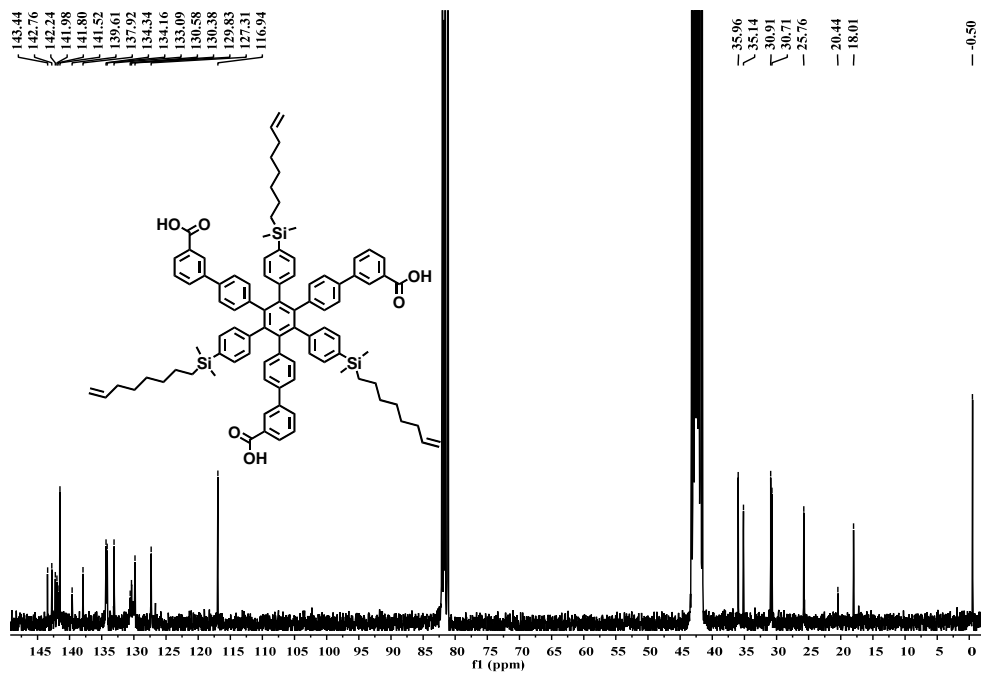

111

112 **Supplementary Figure 11.**  $^{13}\text{C-NMR}$  of L1

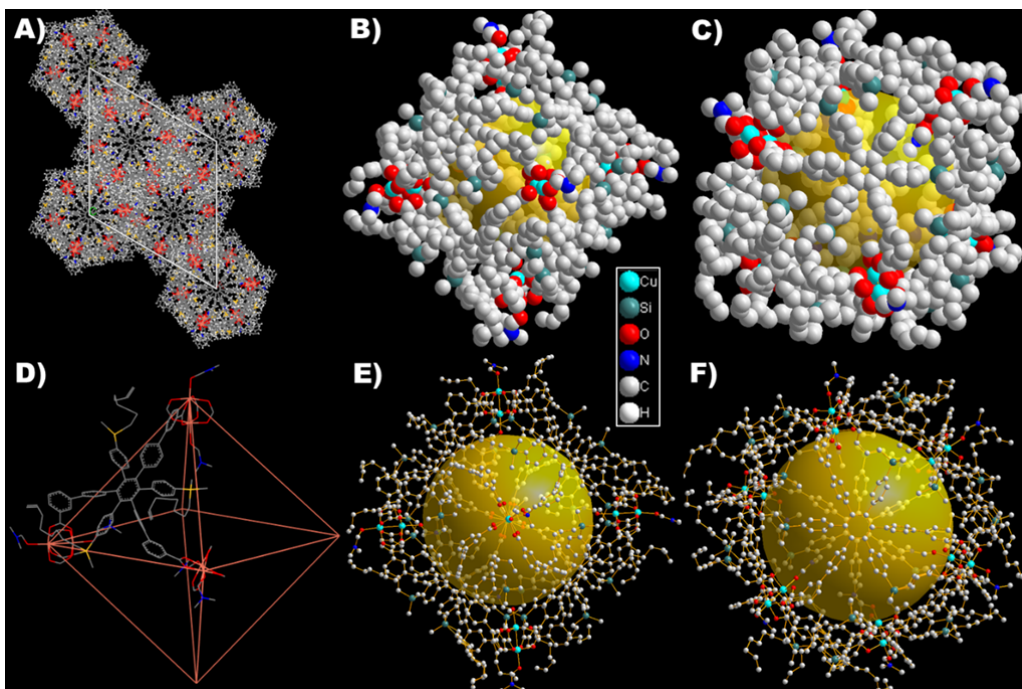

113

114 **Supplementary Figure 12.** A) The unit cell shown along the Z axis direction; B, C)  
 115 Single-crystal structure of **MOP1** in space-filling model; D) The schematic drawing  
 116 of the cage showing an octahedron-shape, which is similar to the one reported by  
 117 Shionoya group (*J. Am. Chem. Soc.* **131**, 11646–11647 (2009))<sup>5</sup> and Lah group (*Inorg.*  
 118 *Chem.* **48**, 1281–1283 (2009))<sup>6</sup>; E, F) The corresponding ball and stick model to B  
 119 and C. The hydrogen atoms are deleted for clarity.

120

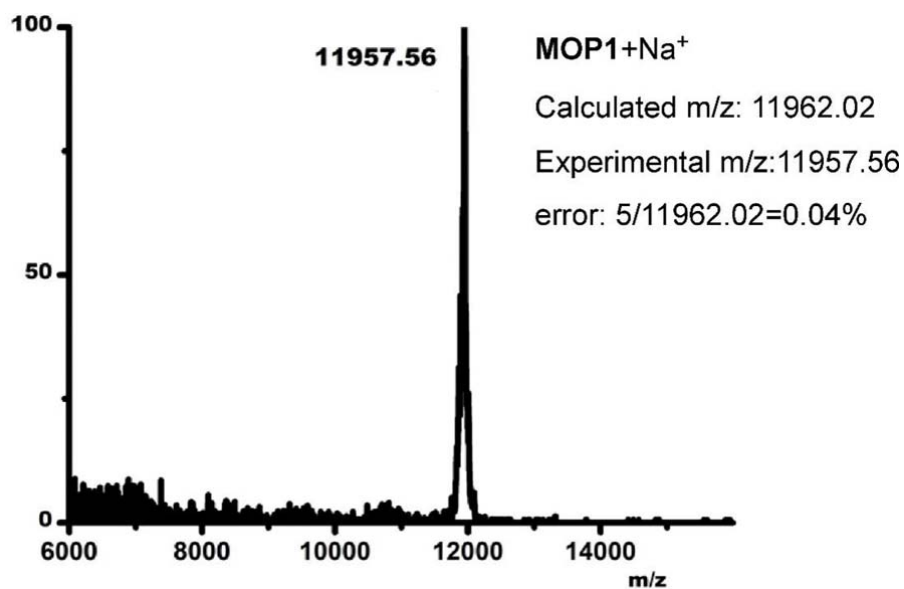

121

122 **Supplementary Figure 13.** MALDI-TOF-MS of **MOP1** with comparison between  
 123 experimental and calculated values

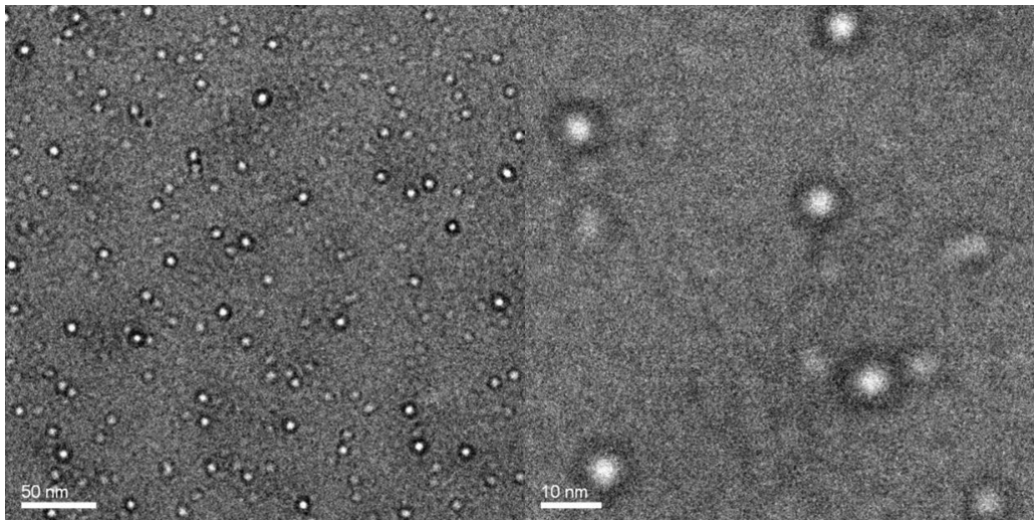

124

125 **Supplementary Figure 14.** HR-TEM of **MOP1** deposited from its DMF solution on  
 126 the carbon support. The sizes are uniformly around 5 nm, consistent with the relative  
 127 size estimation based on its single-crystal structure.

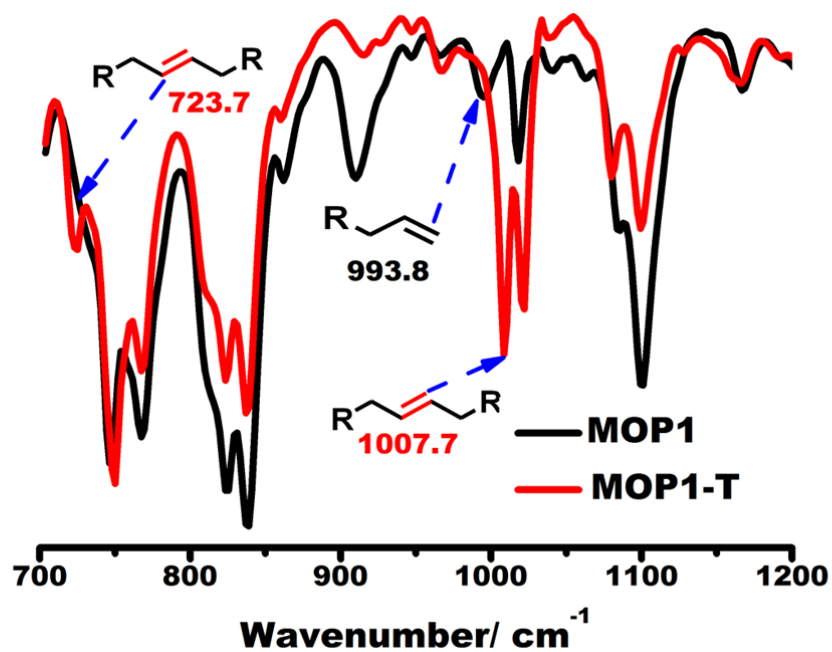

128

129 **Supplementary Figure 15.** IR of the **MOP1** compared with that from **MOP1-T**,  
 130 showing the full disappearance of terminal alkene groups with appearance of internal  
 131 alkene groups in **MOP1-T**.

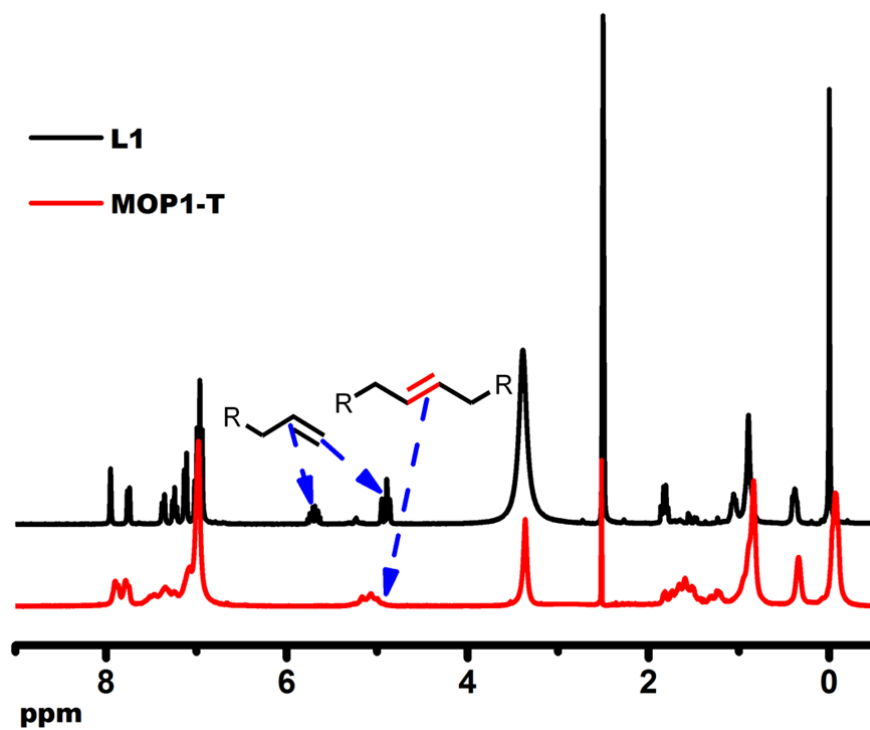

132

133 **Supplementary Figure 16.** Comparison between  $^1\text{H-NMR}$  spectra of **L1** and  
 134 **MOP1-T**, showing the successful and full metathesis transformation.

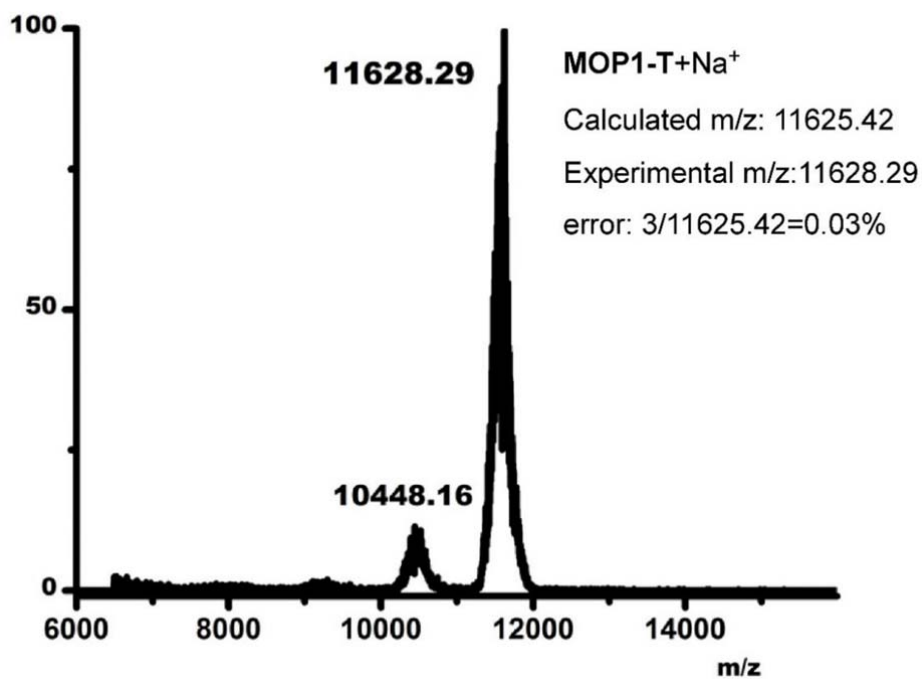

135

136 **Supplementary Figure 17.** MALDI-TOF-MS of **MOP1-T** with comparison between  
 137 experimental and calculated values. The peak at 10448 (m/z) is related to **MOP1-T**  
 138 with the loss of some unknown species during reaction or ionization process.

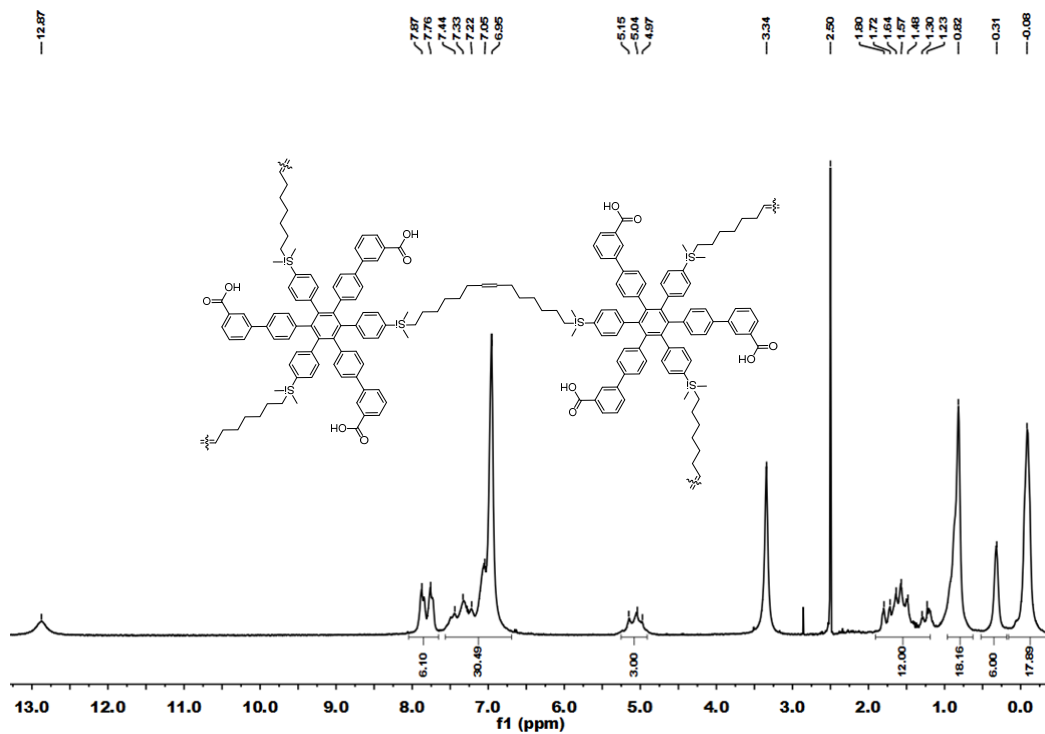

139

140 **Supplementary Figure 18.**  $^1\text{H-NMR}$  of COP1-T

141

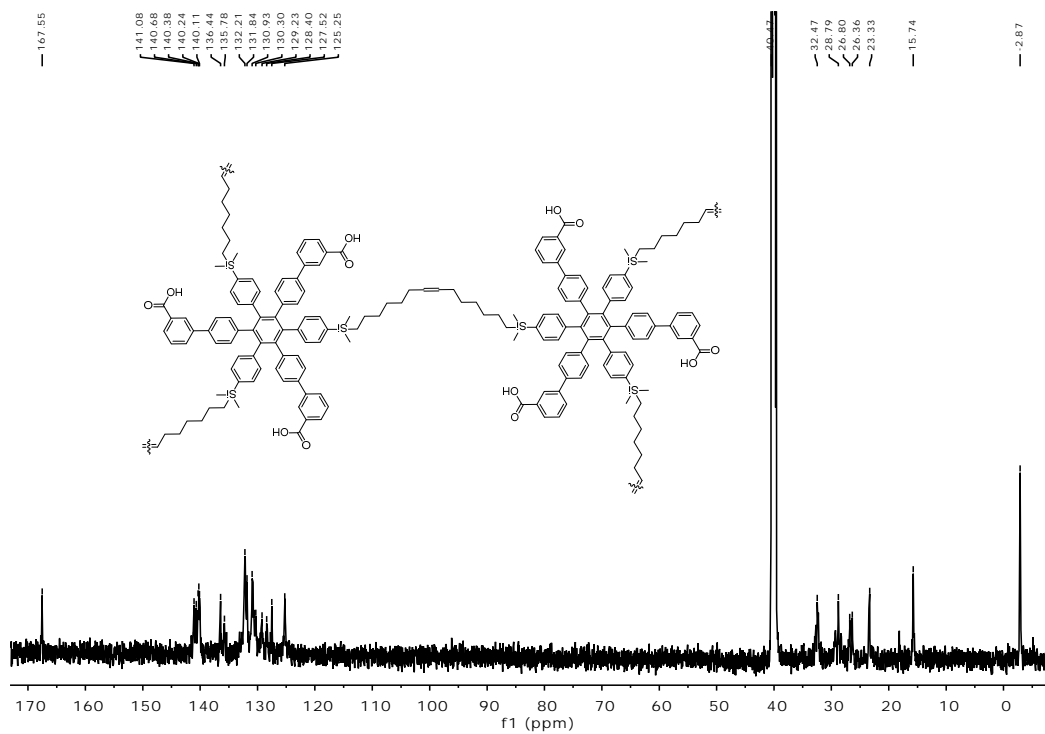

142

143

144 **Supplementary Figure 19.**  $^{13}\text{C-NMR}$  of COP1-T

145

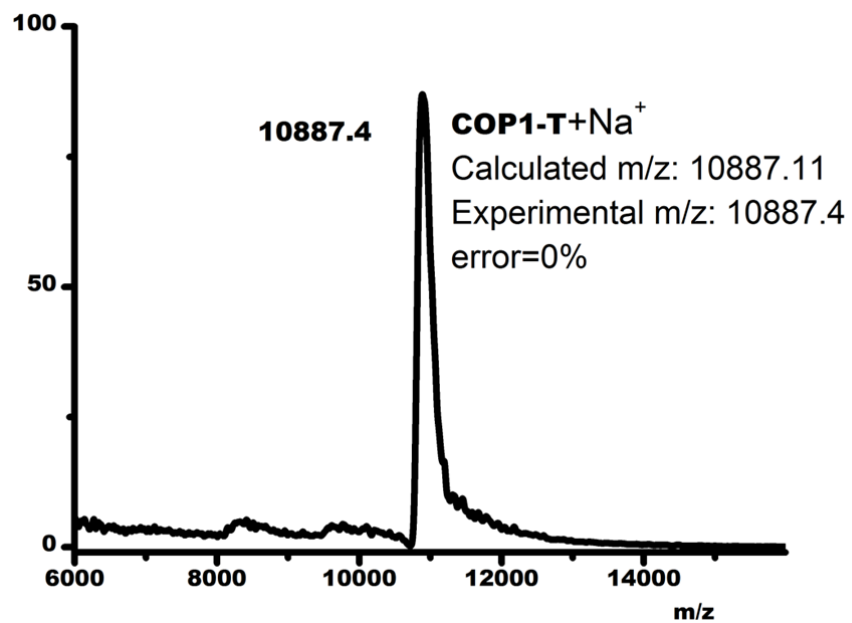

146

147 **Supplementary Figure 20.** MALDI-TOF-MS of the **COP1-T** with comparison  
148 between experimental and calculated values.

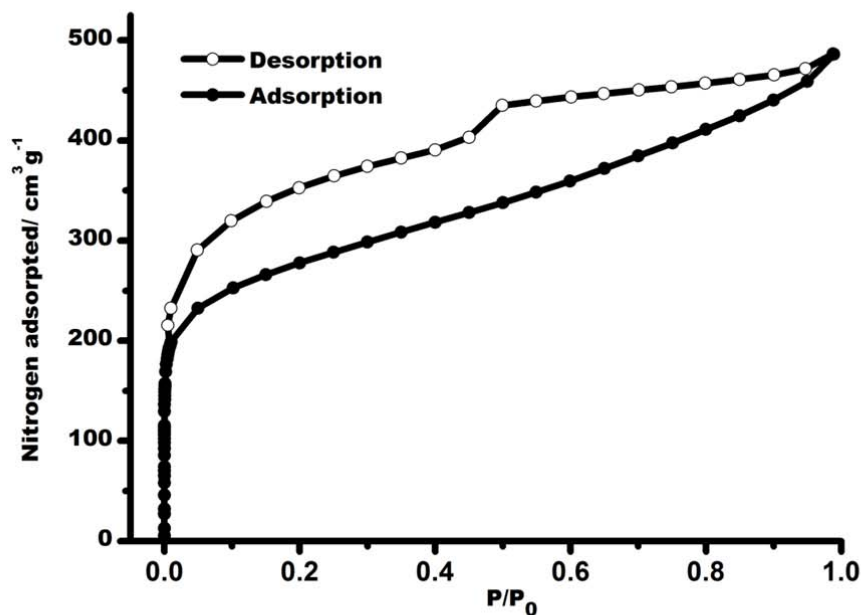

149

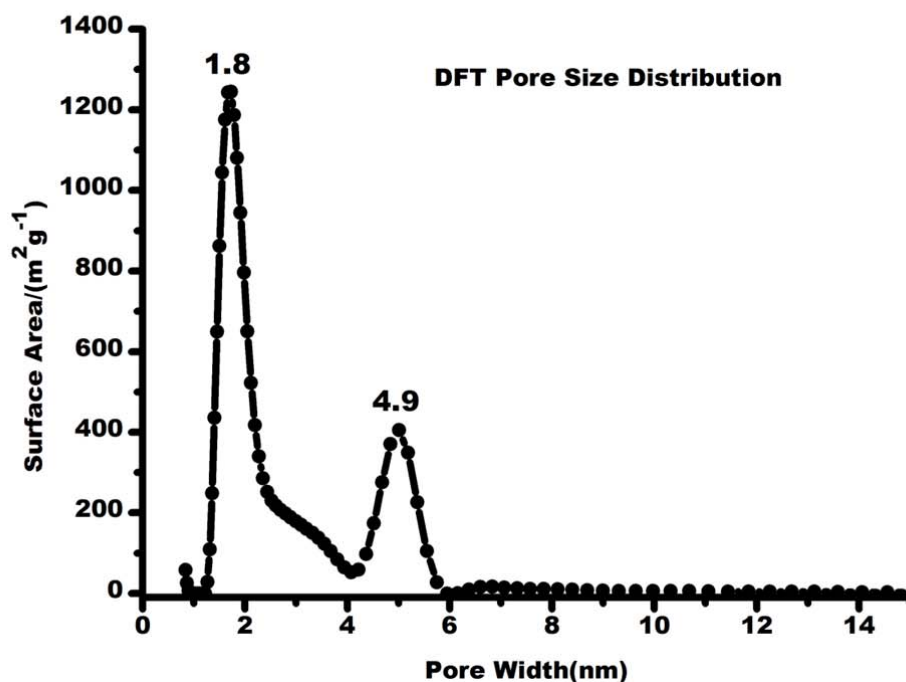

150

151 **Supplementary Figure 21.** Nitrogen sorption isotherms for **COP1-T** at 77 K and  
 152 relative pore size distribution. Estimated total BET surface was around 999.9 m<sup>2</sup>/g  
 153 based on the QSDFT model. The 1.8 nm pore width correspond to the free volume  
 154 within the cage of **COP1-T** while 4.9 nm peak probably is related to the inter-cage  
 155 space. Pore size and volume for **MOP1** were estimated based on its crystal structure  
 156 using the software of Zeo++<sup>7</sup>.

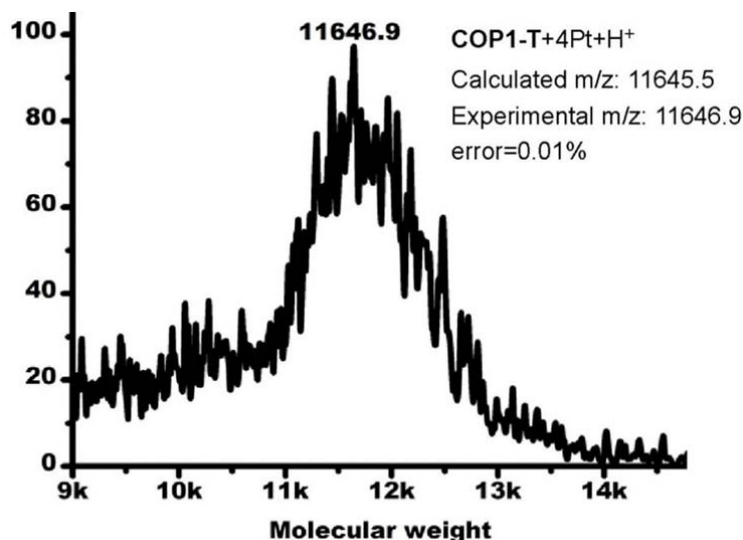

157

158 **Supplementary Figure 22.** MALDI-TOF-MS of the **COP1-T-Pt**. The averaged  
 159 incorporated Pt atoms per **COP1-T** cage was estimated to be 3.89 based on the  
 160 comparison between this spectrum and that of **COP1-T**. The broad peak width was  
 161 characteristic for cages with trapped Pt atoms. For example, Chen et al. reported the  
 162 MALDI-TOF characterization of calixarene cage with trapped Pt<sub>6</sub>, Pt<sub>12</sub> and Pt<sub>18</sub>  
 163 clusters, and similar broad peak widths were found (*J. Am. Chem. Soc.* **138**,  
 164 16236–16239 (2016))<sup>8</sup>. The broad peak width, especially the tail in high MW side,  
 165 might be related to the trapped solvent molecules such as THF and water, which were  
 166 evidently revealed in TGA (Supplementary Fig. 27, thermogravimetric analysis) of  
 167 **COP1-T-Pt**.

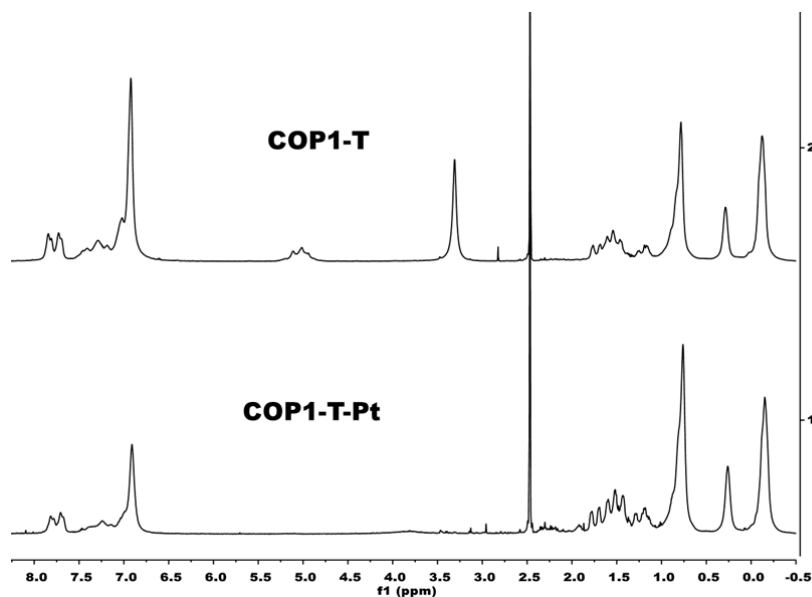

168

169 **Supplementary Figure 23.** <sup>1</sup>H-NMR spectra of **COP1-T** and **COP1-T-Pt**. The  
 170 up-field shifting of the internal alkene hydrogen atoms from around 5.0 ppm to 2.0



171 ppm is a direct evidence for alkene-Pt coordination (*Coordin. Chem. Rev.* **133**, 67–114  
172 (1994))<sup>9</sup>.

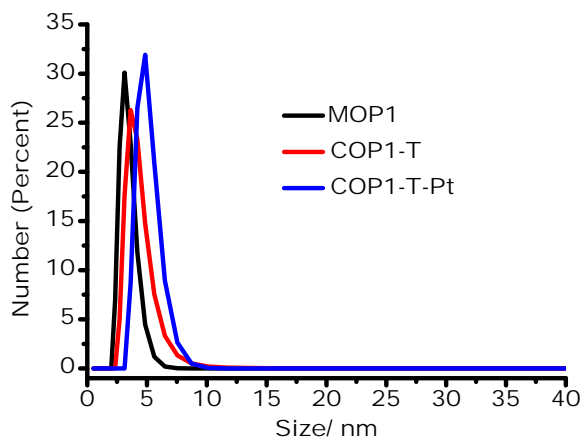

173  
174 **Supplementary Figure 24.** Particle size distribution of **MOP1** (3.1 nm), **COP1-T**  
175 (3.6 nm) and **COP1-T-Pt** (4.8 nm) estimated by DLS in THF (~0.01M). The  
176 expanded size of **COP1-T** compared to **MOP1** is consistent with the successful tying  
177 through the long alkyl chain after metathesis reaction. The even large size of  
178 **COP1-T-Pt** is not clear, but probably is due to increased interaction between THF  
179 solvent molecules with trapped Pt atoms, which subsequently leads to an enhanced  
180 hydrodynamic radius. However, the size of **COP1-T-Pt** shows that it is definitely not  
181 an aggregate of multiple cages.  
182

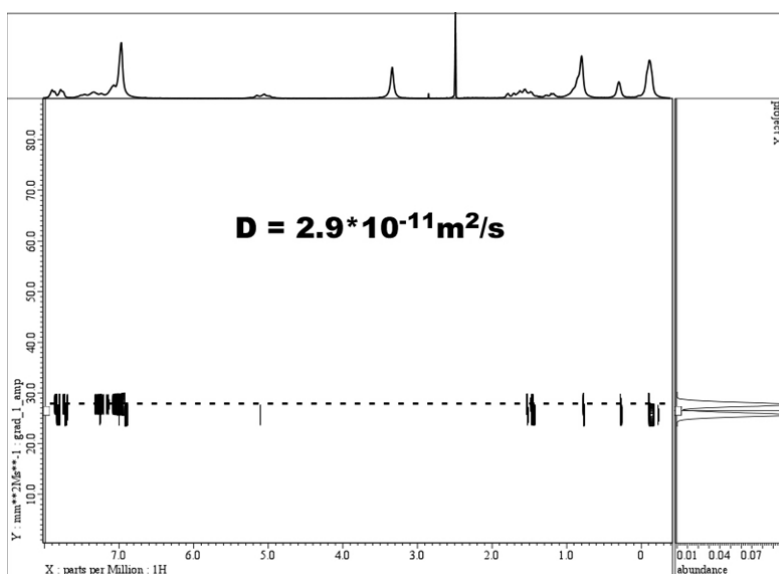

183  
184 **Supplementary Figure 25.** <sup>1</sup>H-DOSY spectrum (600 MHz, DMSO-d<sub>6</sub>, 273 K) of  
185 **COP1-T**.

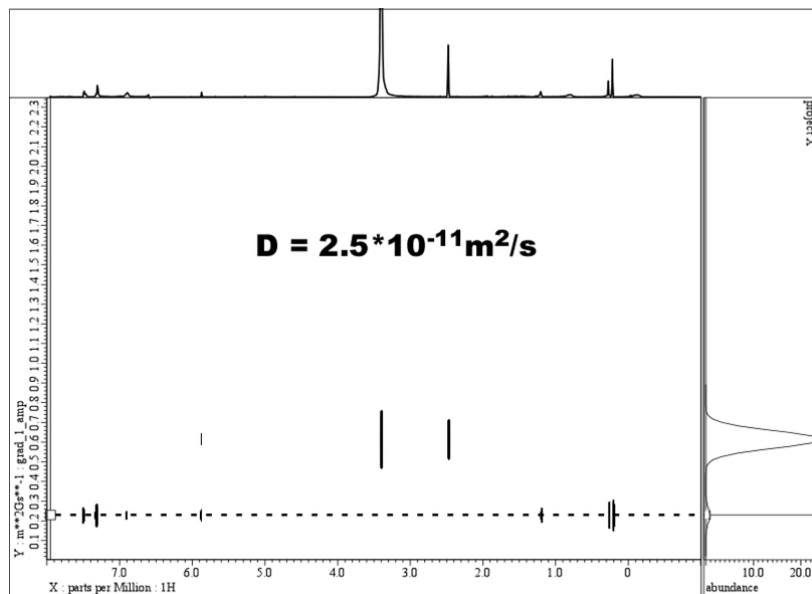

186

187 **Supplementary Figure 26.**  $^1\text{H}$ -DOSY spectrum (600 MHz, DMSO- $d_6$ , 273 K) of  
 188 **COP1-T-Pt**. Its similar diffusion coefficient as that of **COP1-T** is an indication of  
 189 absence of cage aggregation during the introduction of Pt ions into the cage.

190

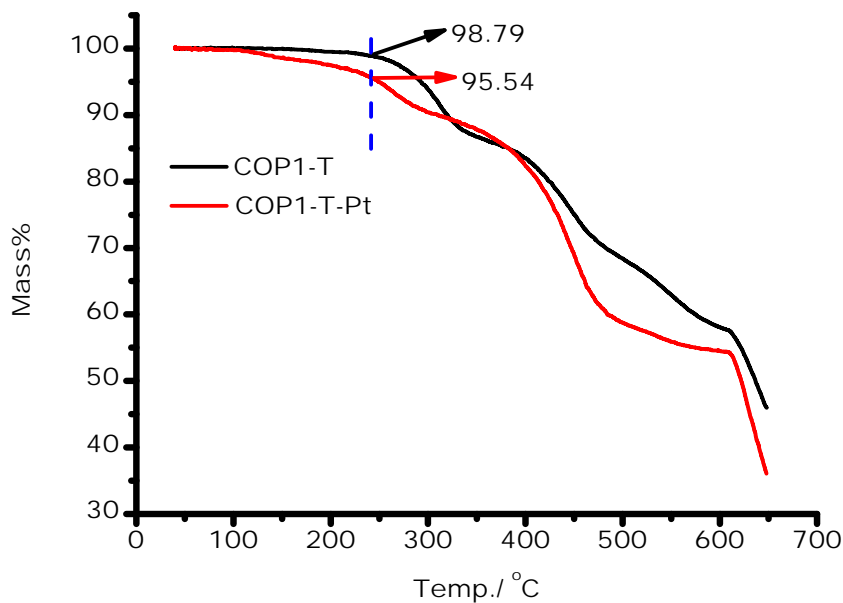

191

192 **Supplementary Figure 27.** TGA of **COP1-T** and **COP1-T-Pt** in argon with the  
 193 heating rate of  $10^\circ\text{C}/\text{min}$ . The around 4.3% difference between **COP1-T** and  
 194 **COP1-T-Pt** was attributed to trapped water and/or THF molecules within the cage for  
 195 **COP1-T-Pt**, probably through Pt-O coordination.

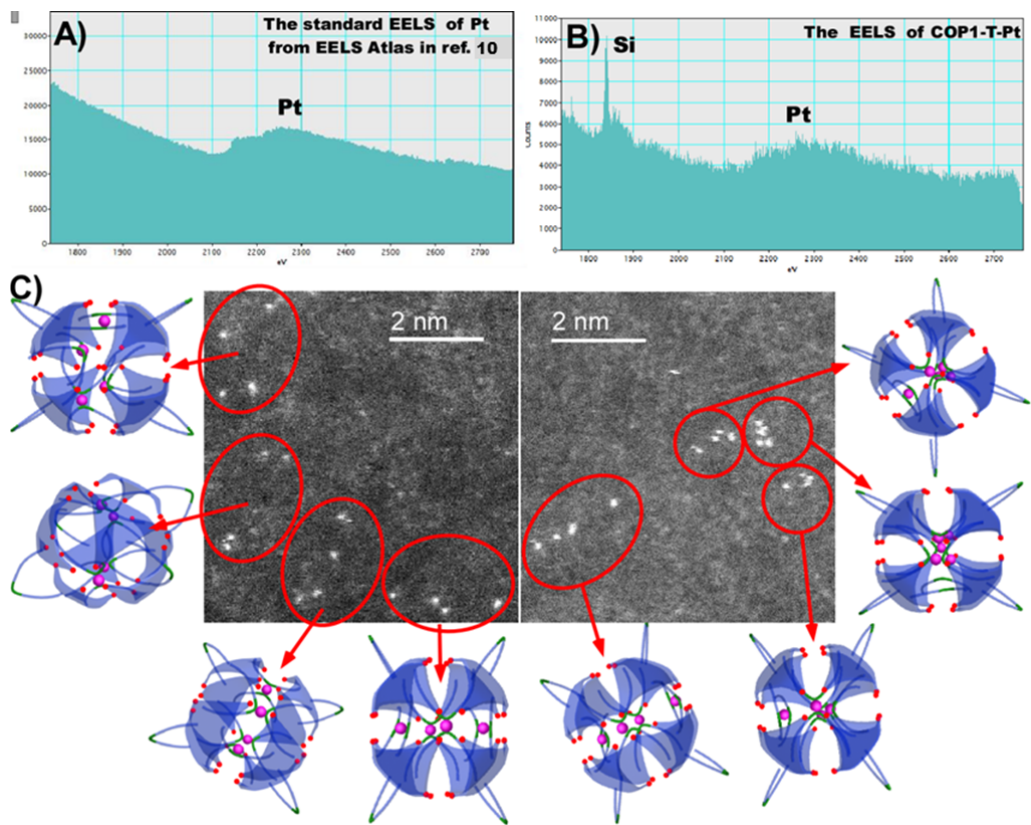

196

197 **Supplementary Figure 28.** (B) Electron Energy Loss Spectroscopy (EELS) for the  
 198 ACHAADF- STEM image revealing the presence of Pt atoms with the comparison  
 199 with standard EELS of Pt from EELS Atlas in ref. 10 (A). (C) ACHAADF-STEM  
 200 images of **COP1-T-Pt** equipped with 3D counterpart of conformation, revealing the  
 201 presence of single Pt atoms.

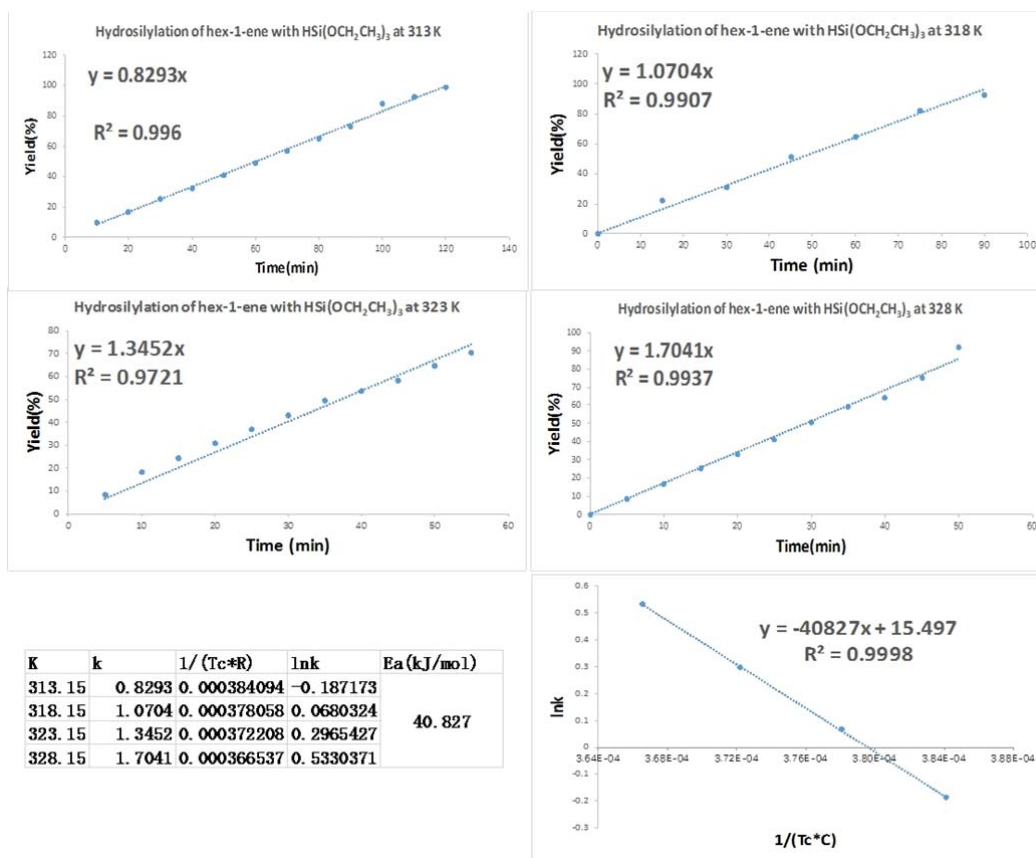

202

203 **Supplementary Figure 29.** Kinetic investigation of the hydrosilylation of n-hexene  
 204 with triethoxysilane for activation energy. The experimental detail was provided in 2-5.

205

206

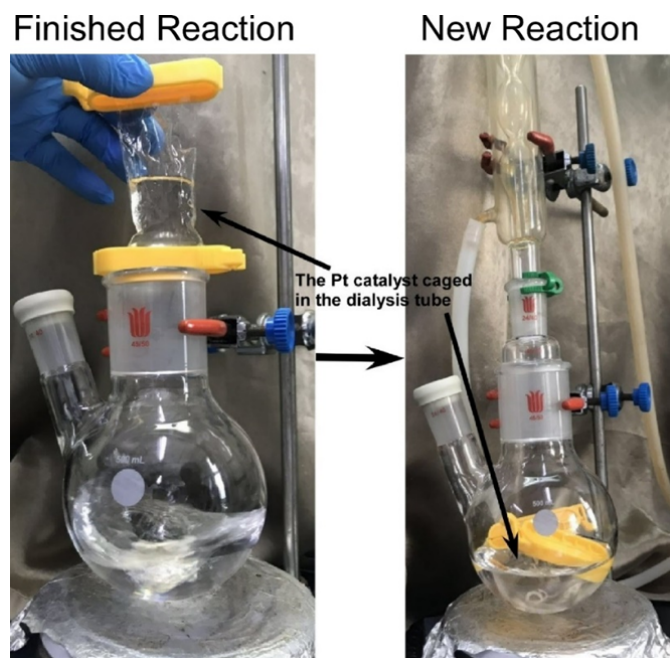

207

208 **Supplementary Figure 30.** Illustration of the **COP1-T-Pt** catalysts caged in dialysis  
209 tube (regenerated cellulose) with the molecular weight cutoff of 2k. The solution in  
210 the dialysis tube was the same as that in the flask, but with the presence of  
211 **COP1-T-Pt** catalyst. The reaction was conducted at 50 °C. Control experiments with  
212 Karstedt's catalyst within the dialysis tube resulted in complete activity loss during  
213 the second use.

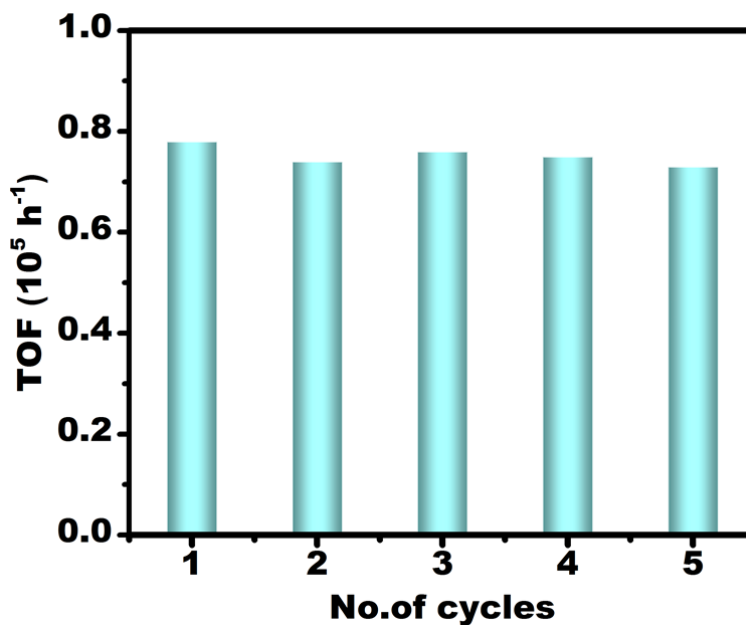

214

215 **Supplementary Figure 31.** Recyclability of the **COP1-T-Pt** catalyst caged in  
216 dialysis tube as supplementary Fig. 30 with the molecular weight cutoff of 2k.

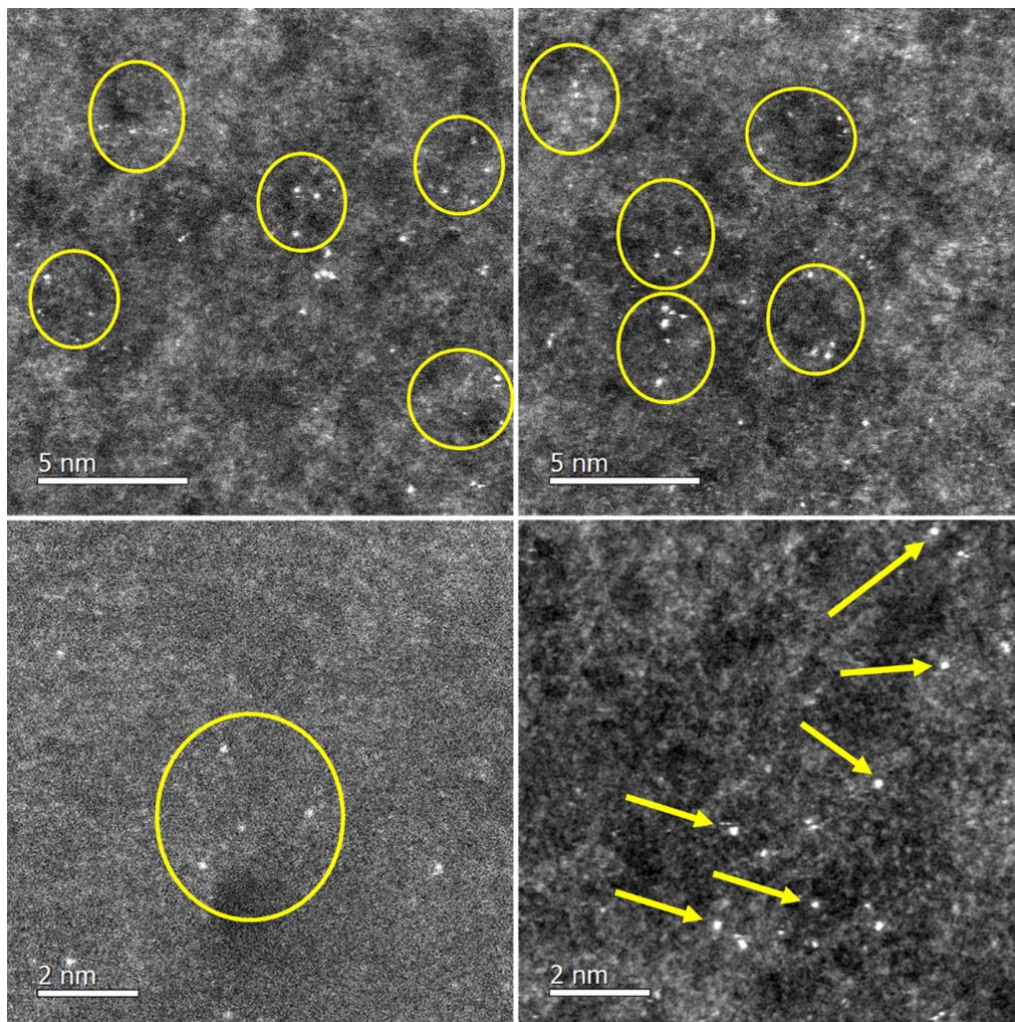

217

218 **Supplementary Figure 32.** ACHAADF-STEM image of **COP1-T-Pt** after five uses  
219 revealing the presence of single Pt atoms.



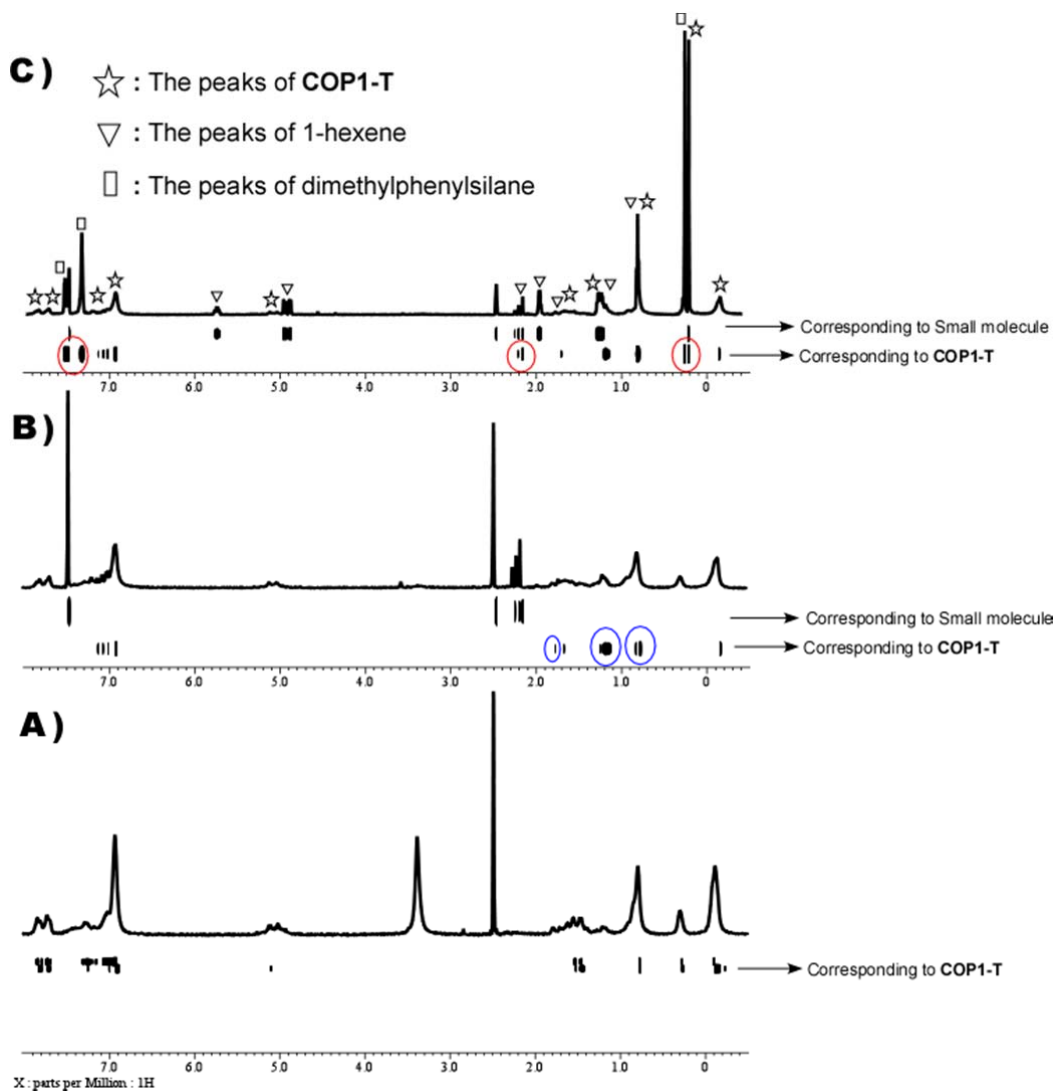

220

221 **Supplementary Figure 33.**  $^1\text{H}$ -DOSY spectrum (600 MHz, DMSO- $d_6$ , 301 K) of  
 222 **COP1-T** (A), **COP1-T** with 1-hexene (B) and **COP1-T** with 1-hexene and  
 223 dimethylphenylsilane (C). The 1-hexene signals within **COP1-T** were highlighted  
 224 with blue circles, and the dimethylphenylsilane signals within **COP1-T** were  
 225 highlighted with red circles.

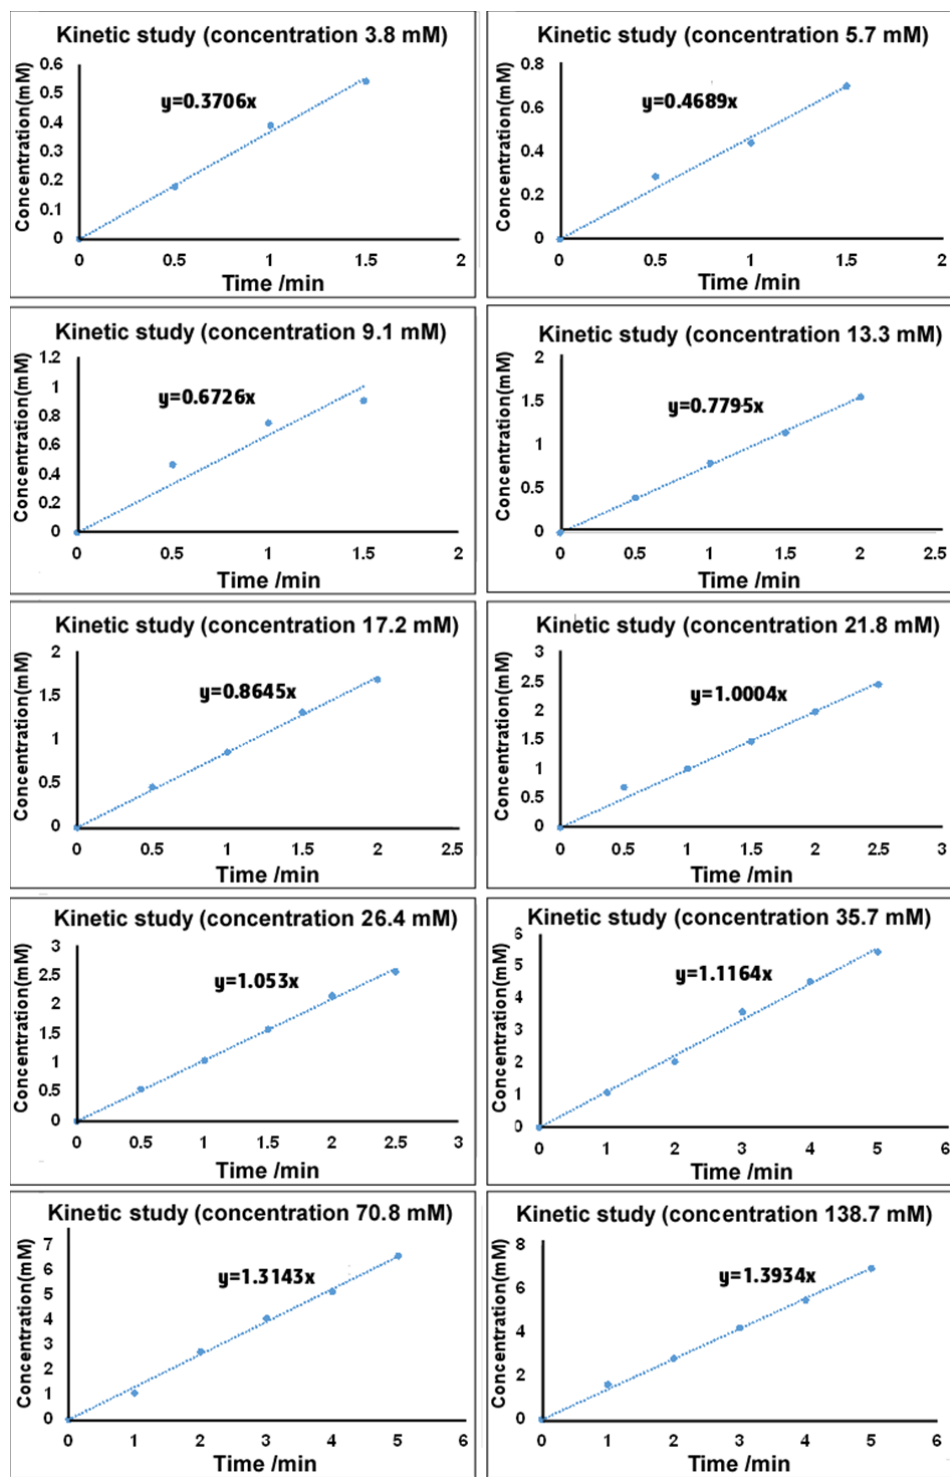

226

227 **Supplementary Figure 34.** The initial reaction rates of the hydrosilylation reaction of  
 228 1-hexene with different concentrations of triethoxysilane (3.7 mM, 5.6 mM, 9.1 mM,  
 229 13.3 mM, 17.2 mM, 21.8 mM, 26.4 mM, 35.7 mM, 70.8 mM, and 138.7 mM  
 230 respectively) at room temperature under argon. The experimental details were  
 231 provided in section 2-1.



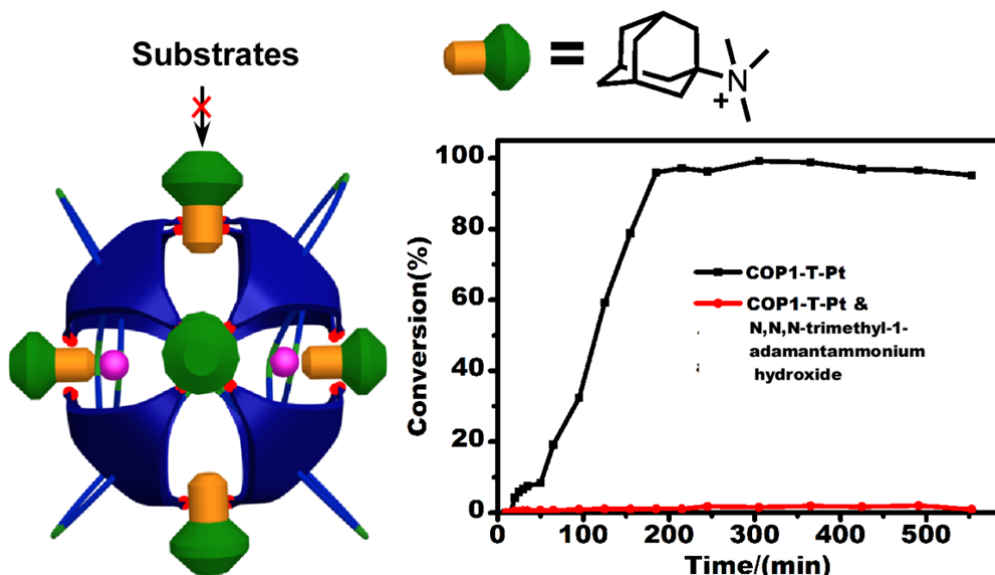

232

233 **Supplementary Figure 35.** The kinetic study for reactions with and without cage  
 234 blocking. The cartoon picture (left) illustrates cage structure with the presence of  
 235 bulky N,N,N-trimethyl-1-adamantammonium ions around. The reaction kinetic  
 236 profile (right) shows that introducing bulky N,N,N-trimethyl-1-adamantammonium  
 237 ions significantly reduces the reaction rate. The experimental detail for both reactions  
 238 was provided in 2-2.

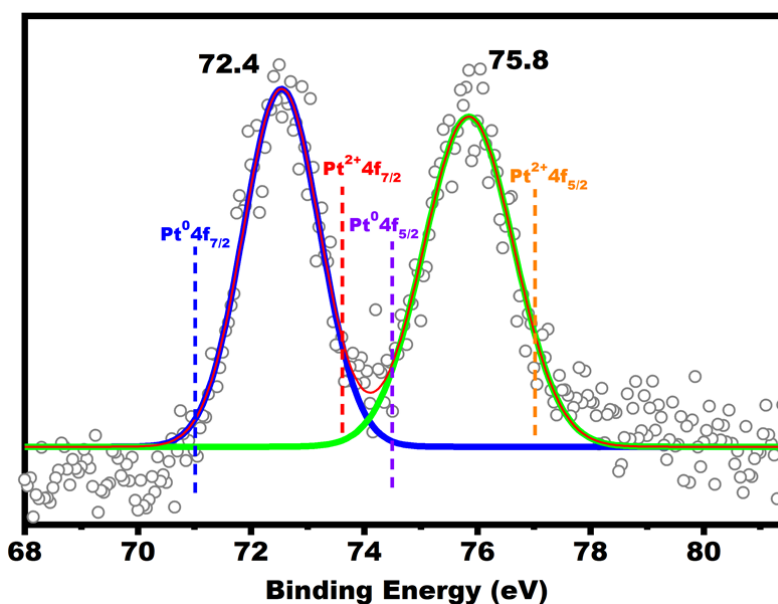

239

240 **Supplementary Figure 36.** The oxidation state of Pt in COP1-T-Pt was measured by  
 241 X-ray photoelectron spectroscopy (XPS). The Pt 4f spectrum was deconvoluted into  
 242 two peaks at binding energies of 75.8 and 72.4 eV, corresponding to 4f<sub>5/2</sub> and 4f<sub>7/2</sub>  
 243 level, respectively. The peak positions are between those of Pt(II) and Pt(0),  
 244 indicating Pt atoms carry partially positive charge (*J. Am. Chem. Soc.* **140**, 7407–7410  
 245 (2018))<sup>11</sup>.

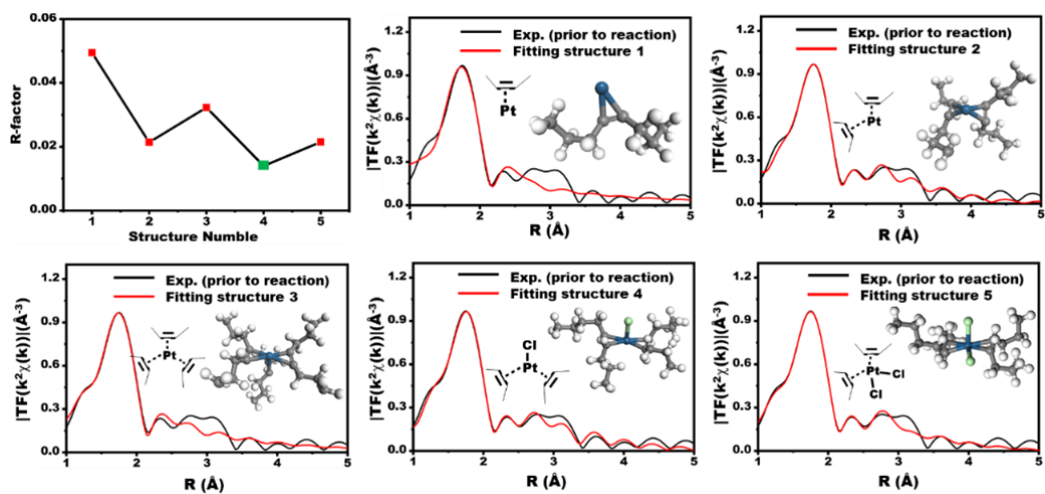

246

247 **Supplementary Figure 37.** The R-factors plot and the corresponding structural  
 248 models for the **COP1-T-Pt** catalyst prior to reaction. The green dot represented the  
 249 best model.

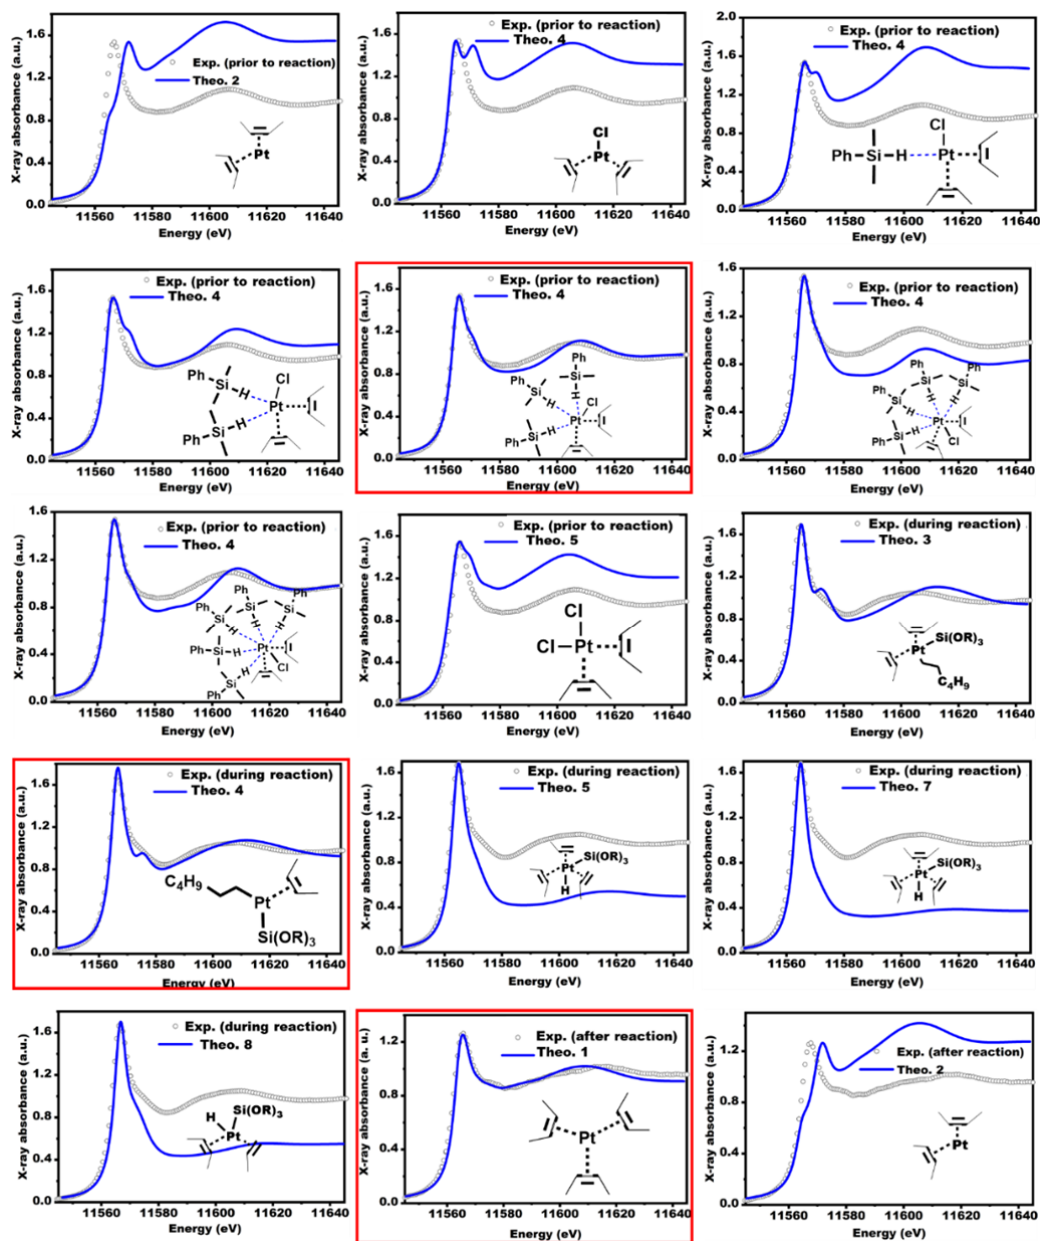

250

251 **Supplementary Figure 38.** The theoretical spectra calculated for the corresponding  
 252 depicted structures which showed relatively small fitting R-factors during EXAFS  
 253 fitting but not used in the manuscript. These simulated spectra for these models match  
 254 less satisfactorily with the best models shown in Figure. 2h-2j. The one highlighted in  
 255 red boxes are the best one.

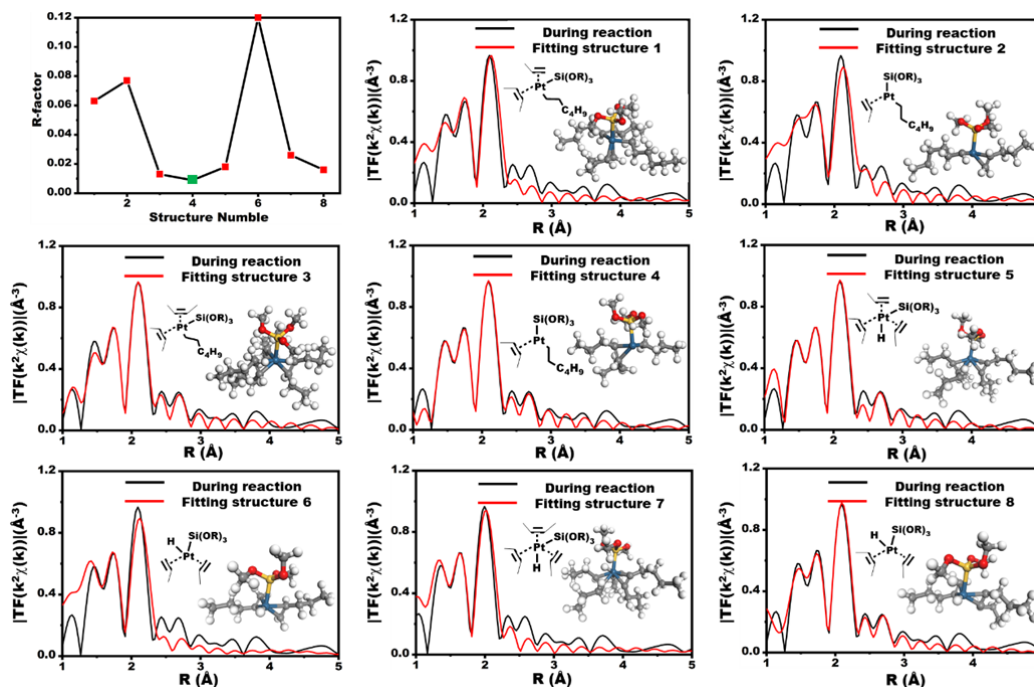

257

258 **Supplementary Figure 39.** The R-factors plot and the corresponding structural  
 259 models for the **COP1-T-Pt** catalyst during reaction. The green dot represented the  
 260 best model.

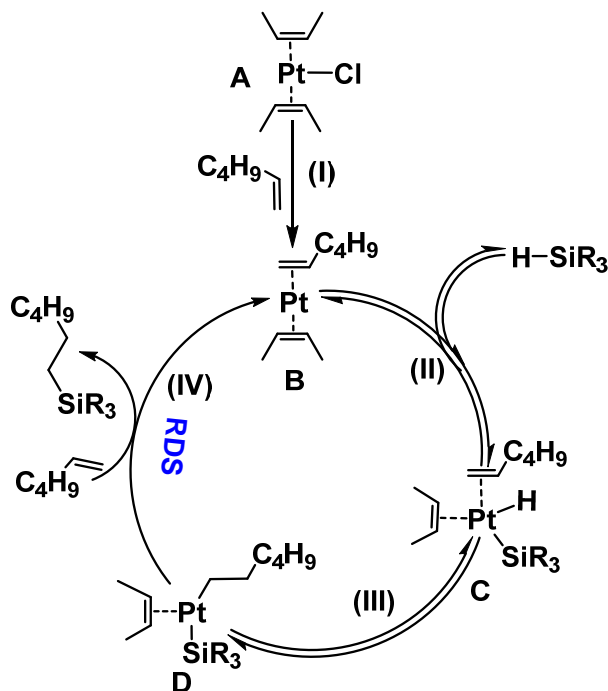

261

262 **Supplementary Figure 40.** The *Chalk-Harrod* reaction mechanism include four steps:  
 263 (I) Transformation of A into zero-valence Pt species ; (II) Oxidative addition of  $\text{HSiR}_3$ ;  
 264 (III) Insertion of the olefin into the Pt-H bond; (IV) Reductive elimination of

265 alkylsilane. It is believed that step II and III are reversible and that step IV is the rate  
 266 determining step (RDS).

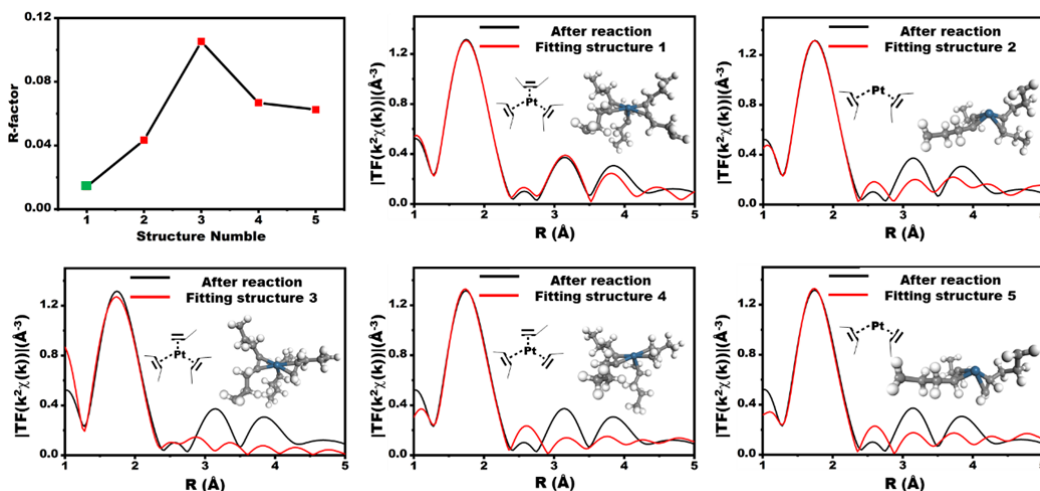

267

268 **Supplementary Figure 41.** The R-factor plot of the corresponding fitted structural  
 269 models for the **COP1-T-Pt** catalyst after reaction. The green dot represented the  
 270 selected the structure model.

271

272

273 **Supplementary Table 2.** Pt L3-edge EXAFS curve fitting parameters of **COP1-T-Pt**  
 274 prior to reaction<sup>a</sup>

| Structure NO. | path  | N | R (Å)   | $\sigma^2$ (Å <sup>2</sup> ) | $\Delta E0$ (eV) | R            |
|---------------|-------|---|---------|------------------------------|------------------|--------------|
| 1             | Pt-C1 | 1 | 2.0618  | 0.02809                      | 3.263            | 0.049        |
|               | Pt-C2 | 1 | 2.1689  | 0.01178                      | 15.796           |              |
| 2             | Pt-C1 | 1 | 2.01452 | 0.00806                      | -1.999           | 0.021        |
|               | Pt-C2 | 1 | 2.18480 | 0.01301                      | -0.500           |              |
|               | Pt-C3 | 1 | 2.34217 | 0.00987                      | 14.278           |              |
|               | Pt-C4 | 1 | 2.96728 | 0.00778                      | 18.779           |              |
| 3             | Pt-C1 | 1 | 1.9018  | 0.00547                      | -27.993          | 0.032        |
|               | Pt-C2 | 2 | 2.17408 | 0.00805                      | 15.785           |              |
|               | Pt-C3 | 2 | 2.16708 | 0.00191                      | 0.994            |              |
|               | Pt-C4 | 1 | 2.69111 | 0.0433                       | 33.149           |              |
| 4             | Pt-C1 | 1 | 2.1277  | 0.01208                      | 1.843            | <b>0.014</b> |
|               | Pt-C2 | 2 | 2.18428 | 0.00917                      | 1.554            |              |
|               | Pt-C3 | 1 | 2.52692 | 0.00914                      | 8.811            |              |
|               | Pt-Cl | 1 | 2.67423 | 0.00097                      | -9.806           |              |
| 5             | Pt-C1 | 2 | 2.23997 | 0.0006                       | 28.805           | 0.022        |
|               | Pt-C2 | 2 | 2.5028  | 0.01466                      | 6.164            |              |
|               | Pt-Cl | 2 | 2.4998  | 0.01038                      | 3.582            |              |

275

276

277

278

279

280 **Supplementary Table 3.** Pt L3-edge EXAFS curve fitting parameters of **COP1-T-Pt**  
 281 during reaction<sup>b</sup>

| Structure NO. | path  | N | R (Å)   | $\sigma^2$ (Å <sup>2</sup> ) | $\Delta E0$ (eV) | R             |          |          |
|---------------|-------|---|---------|------------------------------|------------------|---------------|----------|----------|
| <b>1</b>      | Pt-C  | 2 | 2.0859  | 0.00407                      | 13.957           | 0.063         |          |          |
|               | Pt-C  | 1 | 2.1481  |                              |                  |               |          |          |
|               | Pt-C  | 1 | 2.4065  |                              |                  |               |          |          |
|               | Pt-C  | 1 | 2.4066  |                              |                  |               |          |          |
|               | Pt-Si | 1 | 2.4215  |                              |                  |               | -0.00106 | -8.048   |
| <b>2</b>      | Pt-C  | 1 | 1.9823  | 0.04576                      | 4.333            | 0.077         |          |          |
|               | Pt-C  | 2 | 2.1351  |                              |                  |               |          |          |
|               | Pt-Si | 1 | 2.4374  |                              |                  |               | -0.0027  | -9.340   |
| <b>3</b>      | Pt-C  | 2 | 2.0172  | 0.00450                      | 7.048            | 0.013         |          |          |
|               | Pt-C  | 2 | 2.1946  |                              |                  |               |          |          |
|               | Pt-C  | 1 | 2.3343  |                              |                  |               |          |          |
|               | Pt-Si | 1 | 2.6984  |                              |                  |               | 0.01164  | 21.024   |
| <b>4</b>      | Pt-C  | 1 | 2.0034  | 0.00444                      | 9.438            | <b>0.0089</b> |          |          |
|               | Pt-C  | 1 | 2.1578  |                              |                  |               |          |          |
|               | Pt-C  | 1 | 2.3201  |                              |                  |               |          |          |
|               | Pt-Si | 1 | 2.6353  |                              |                  |               | 0.00732  | 13.890   |
| <b>5</b>      | Pt-H  | 1 | 1.7899  | -0.01255                     | 28.809           | 0.018         |          |          |
|               | Pt-C  | 2 | 2.0916  |                              |                  |               |          |          |
|               | Pt-C  | 1 | 2.2058  |                              |                  |               |          |          |
|               | Pt-C  | 2 | 2.4095  |                              |                  |               |          |          |
| <b>6</b>      | Pt-Si | 1 | 2.3877  | 0.08675                      | 137.160          | 0.12          |          |          |
|               | Pt-H  | 1 | 1.7164  |                              |                  |               |          |          |
|               | Pt-C  | 1 | 2.1002  |                              |                  |               |          |          |
|               | Pt-C  | 2 | 2.1463  |                              |                  |               |          |          |
|               | Pt-C  | 1 | 2.1741  |                              |                  |               |          |          |
| <b>7</b>      | Pt-Si | 1 | 2.5129  | -0.00042                     | 5.052            | 0.026         |          |          |
|               | Pt-H  | 1 | 1.5854  |                              |                  |               | -0.01054 | -154.852 |
|               | Pt-C  | 2 | 1.9665  |                              |                  |               |          |          |
|               | Pt-C  | 1 | 2.1488  |                              |                  |               | -0.00572 | 12.049   |
|               | Pt-C  | 2 | 2.3295  |                              |                  |               |          |          |
| <b>8</b>      | Pt-Si | 1 | 2.5123  | -0.00193                     | -12.858          | 0.016         |          |          |
|               | Pt-H  | 1 | 1.80445 |                              |                  |               | -0.00900 | 28.808   |
|               | Pt-C  | 1 | 2.06050 |                              |                  |               |          |          |
|               | Pt-C  | 2 | 2.14701 |                              |                  |               | 0.00499  | 11.454   |
|               | Pt-C  | 1 | 2.33016 |                              |                  |               |          |          |
|               | Pt-Si | 1 | 2.54488 | 0.00704                      | 3.662            |               |          |          |

282

283

284  
285  
286  
287

**Supplementary Table 4.** Pt L3-edge EXAFS curve fitting parameters of **COP1-T-Pt** after reaction<sup>c</sup>

| Structure NO. | path  | N   | R (Å)   | $\sigma^2$ (Å <sup>2</sup> ) | $\Delta E_0$ (eV) | R            |
|---------------|-------|-----|---------|------------------------------|-------------------|--------------|
| <b>1</b>      | Pt-C1 | 1.2 | 1.78287 | 0.02849                      | -7.649            | <b>0.014</b> |
|               | Pt-C2 | 1.2 | 1.96128 | 0.02935                      | 10.275            |              |
|               | Pt-C3 | 2.4 | 2.06692 | 0.02434                      | -11.873           |              |
|               | Pt-C4 | 1.1 | 3.10109 | 0.01602                      | 5.0762            |              |
| <b>2</b>      | Pt-C1 | 1   | 1.68207 | -0.03886                     | 7.086             | 0.043        |
|               | Pt-C2 | 1   | 2.07118 | 0.04216                      | -10.802           |              |
|               | Pt-C3 | 1   | 1.97939 | 0.04261                      | 11.881            |              |
|               | Pt-C4 | 1   | 2.37918 | -0.04041                     | -6.1023           |              |
| <b>3</b>      | Pt-C1 | 2   | 2.0194  | 0.01709                      | 16.225            | 0.11         |
|               | Pt-C2 | 2   | 2.10342 | 0.00144                      | -20.641           |              |
|               | Pt-C3 | 2   | 2.11366 | -0.01002                     | -14.081           |              |
| <b>4</b>      | Pt-C1 | 2   | 1.95432 | -0.02569                     | 15.175            | 0.067        |
|               | Pt-C2 | 2   | 2.06674 | 0.02729                      | -8.575            |              |
|               | Pt-C3 | 2   | 2.18375 | 0.0286                       | 2.781             |              |
| <b>5</b>      | Pt-C1 | 1   | 1.97684 | -0.02726                     | 14.97             | 0.063        |
|               | Pt-C2 | 1   | 2.09108 | -0.02966                     | 0.48              |              |
|               | Pt-C3 | 2   | 2.20656 | -0.02938                     | -12.622           |              |

288  
289  
290  
291  
292  
293  
294  
295  
296  
297  
298  
299  
300  
301  
302  
303  
304  
305  
306

$N$ , coordination number;  $R$ , distance between absorber and backscatter atoms;  $\sigma^2$ , Debye-Waller factor to account for both thermal and structural disorders;  $\Delta E_0$ , inner potential correction;  $R$  factor indicates the goodness of the fit. Error bounds (accuracies) that characterize the structural parameters obtained by EXAFS spectroscopy are estimated as  $N \pm 20\%$ ;  $R \pm 1\%$ ;  $\sigma^2 \pm 20\%$ ;  $\Delta E_0 \pm 20\%$ .  $SO_2$  was fixed to 1.0 as determined from Pt foil fitting. Coordination number ( $N$ ) fixed according to the crystal structure. <sup>a</sup>Fitting range:  $3.0 \leq k$  ( $\text{\AA}^{-1}$ )  $\leq 11.9$  and  $1.2 \leq R$  ( $\text{\AA}$ )  $\leq 3.5$ . <sup>b</sup>The path parameters  $\Delta E_0$  and  $\sigma^2$  of the same atoms were set uniform to reduce the fitting parameters due to the multishell of Pt catalyst during reaction. Fitting range:  $2 \leq k$  ( $\text{\AA}^{-1}$ )  $\leq 12.5$  and  $1.2 \leq R$  ( $\text{\AA}$ )  $\leq 4$ . <sup>c</sup>Fitting range:  $3.0 \leq k$  ( $\text{\AA}^{-1}$ )  $\leq 10.2$  and  $1.2 \leq R$  ( $\text{\AA}$ )  $\leq 3.5$ . The R-factor should be stated that: R-factor < 0.02 means the model is good, 0.02 < R-factor < 0.05 means the models slightly deviate or data quality is not good enough, 0.05 < R-factor < 0.1 means the models greatly deviate or data quality is bad, R-factor > 0.1 means the models is wrong. Reduced chi-square can't represent the fitting quality, so it wasn't shown here. All the fitting variables using custom guess method.

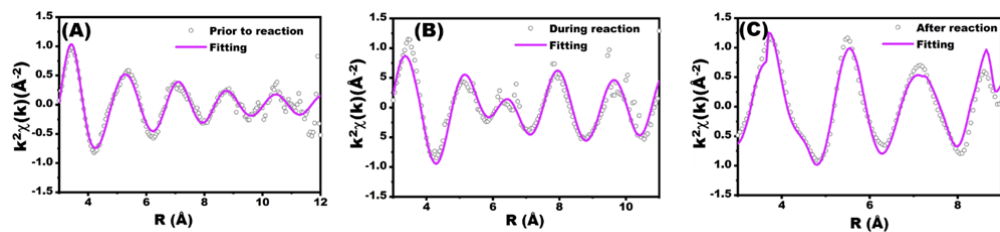

307  
308  
309  
310

**Supplementary Figure 42.** A, B, C) The structures and quantitative EXAFS fitting curves at K space for **COPI-T-Pt** prior to reaction, during reaction and after reaction.

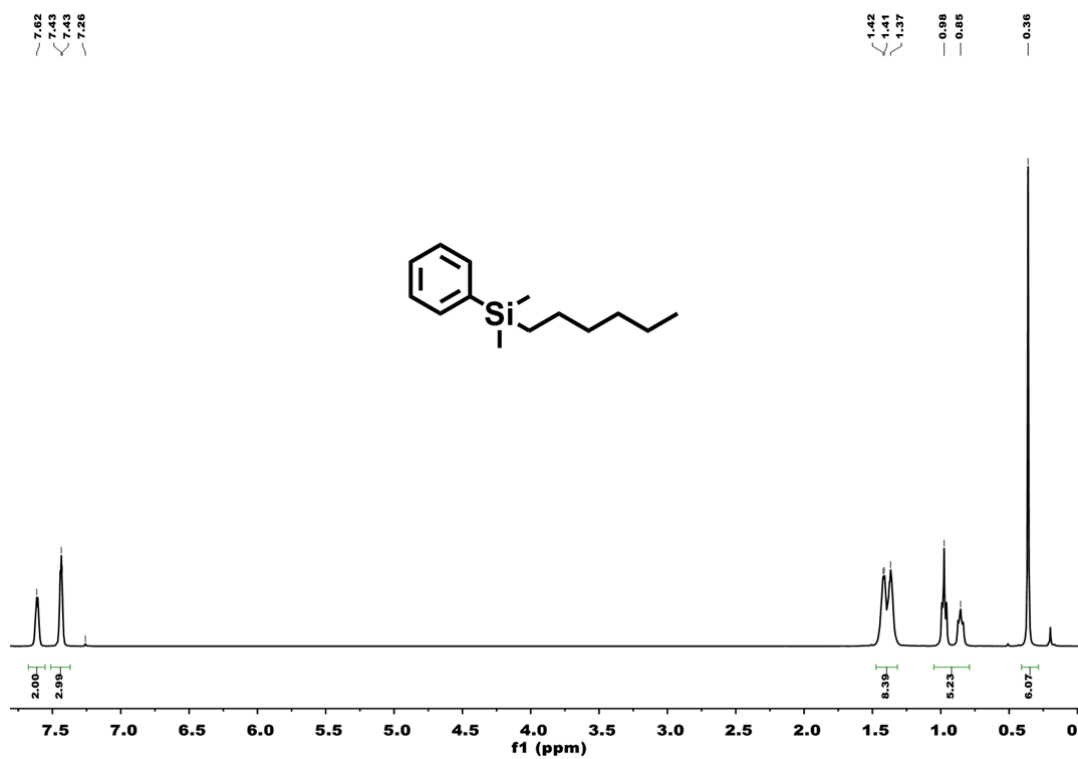

311

312 **Supplementary Figure 43.**  $^1\text{H-NMR}$  of compound **2**



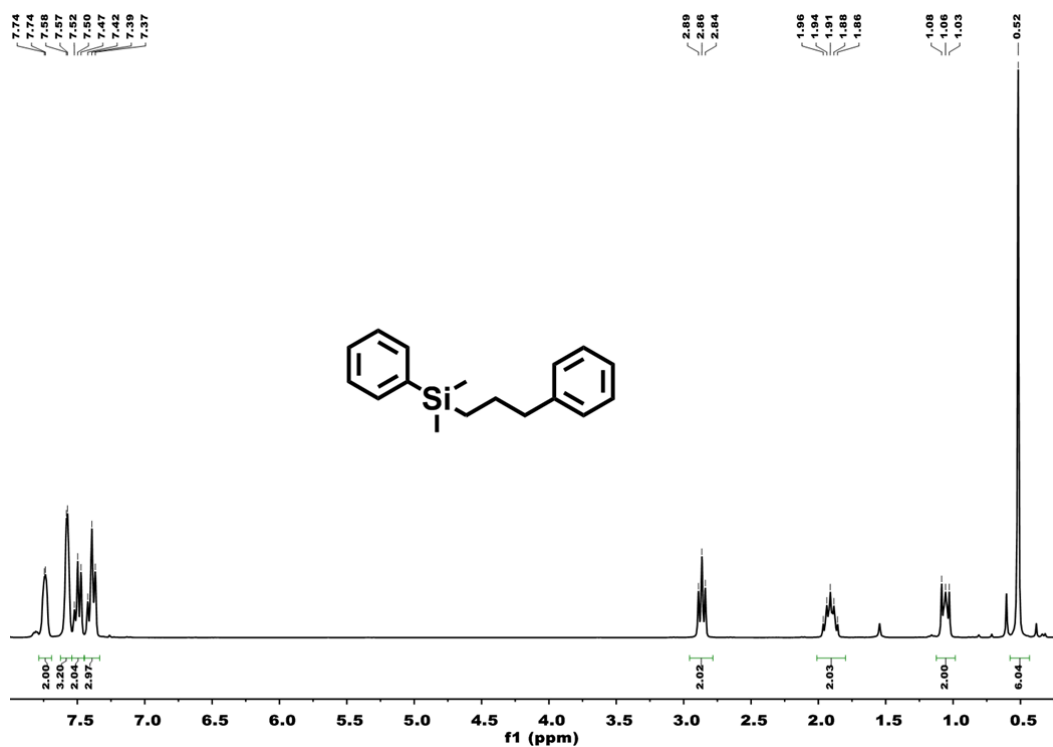

313

314 **Supplementary Figure 44.**  $^1\text{H-NMR}$  of compound 3

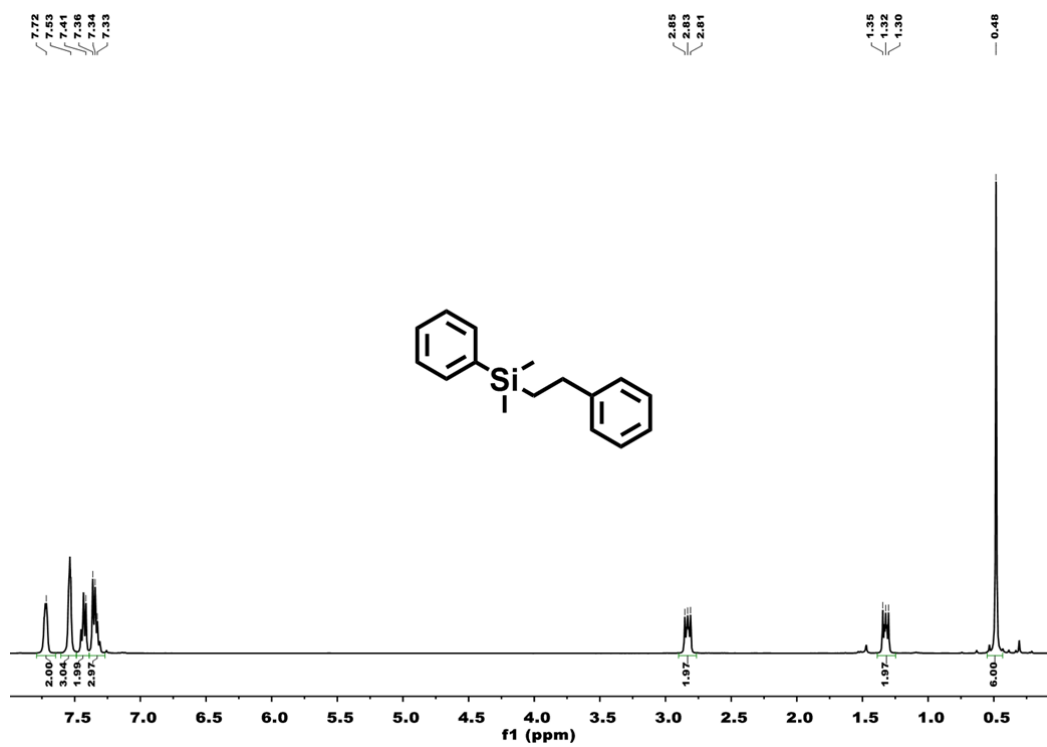

315

316 **Supplementary Figure 45.**  $^1\text{H-NMR}$  of compound 4

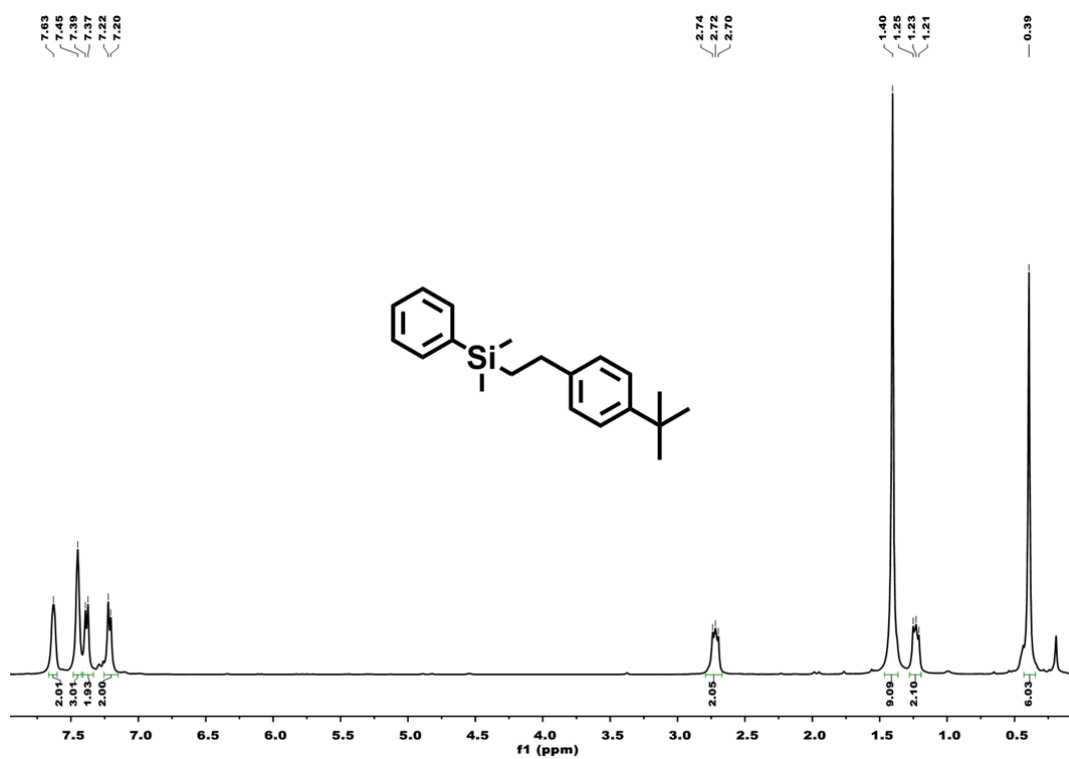

317

318 **Supplementary Figure 46.**  $^1\text{H-NMR}$  of compound **5**

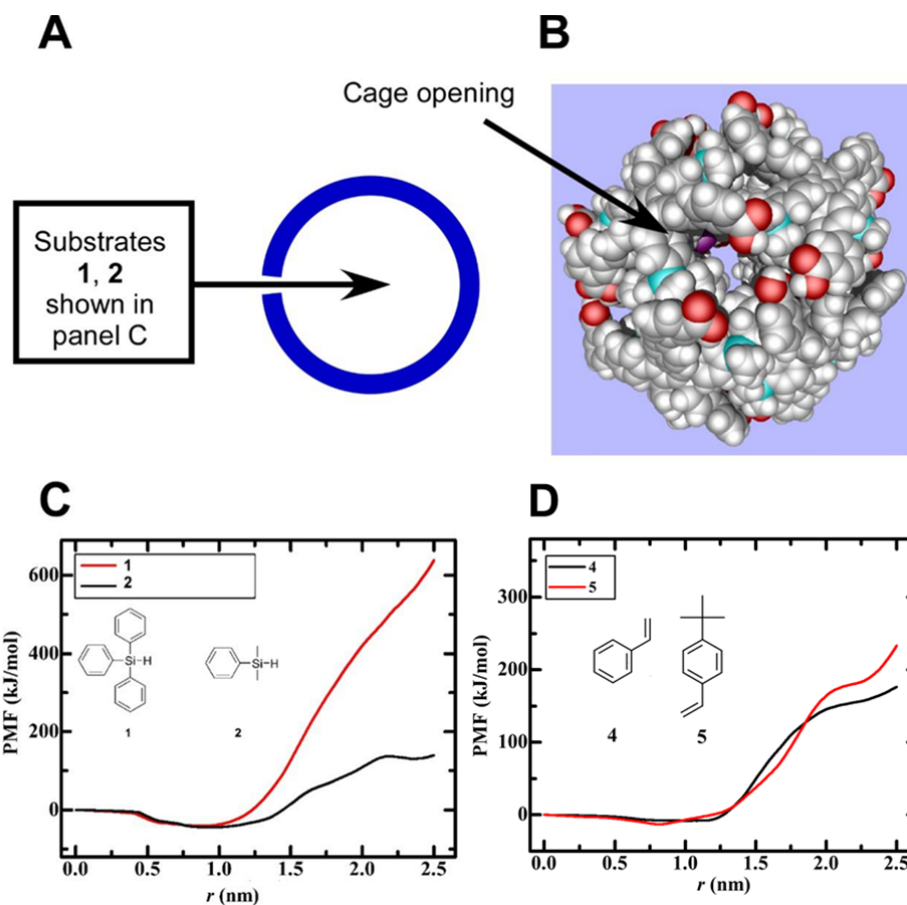

319

320 **Supplementary Figure 47.** Potential of mean force (PMF) calculated from pulling  
 321 along the reaction coordinates ( $r$ ) defined from outside to the center of the cage catalyst  
 322 (A). Starting point of the reaction coordinate was located 2.5 nm away from the cage  
 323 center. Initial structure model of the cage catalyst was built from the single-crystal  
 324 structure of **MOP1** using the software of Diamond with the following procedure. First,  
 325 the adjacent alkene bonds were metathesized, and then copper ions were removed to  
 326 construct the model of **COP1-T**. Then four Pt atoms were inserted into the cage, and  
 327 coordination between alkene and Pt atoms were established by making bonds between  
 328 the alkene groups and Pt atoms. Three alkenes were made to connect to each Pt atom.  
 329 The obtained structure was finally optimized to converge at PM7 level through the use  
 330 of the software of MOPAC to get the final structure of **COP1-T-Pt** (B). (C) It showed  
 331 that it took the larger triphenyl silane more energy to reach the center through the  
 332 opening than dimethylphenyl silane. (D) Theoretical calculation showing the effect of  
 333 the tertbutyl group when passing through the pore of **COP1-T-Pt**. It should be noted  
 334 that the simulation can only qualitatively characterize the difficulty of molecules  
 335 entering the cage catalyst.

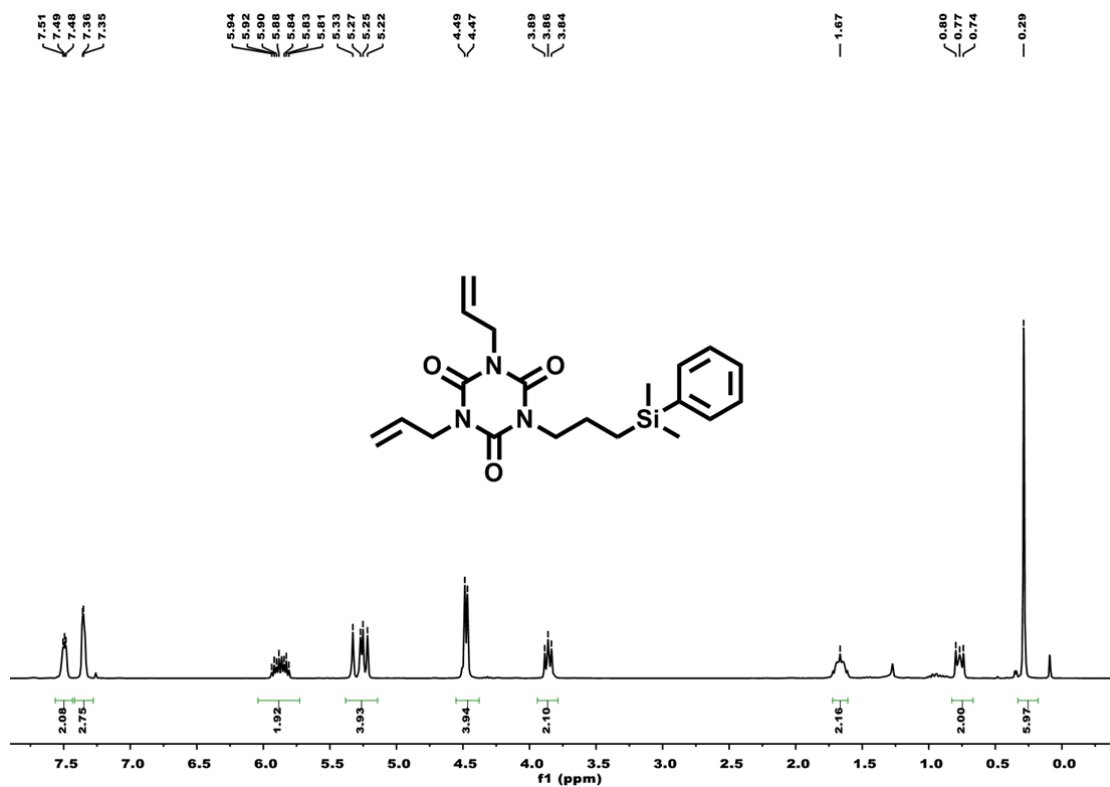

336

337 **Supplementary Figure 48.** <sup>1</sup>H-NMR of compound 12

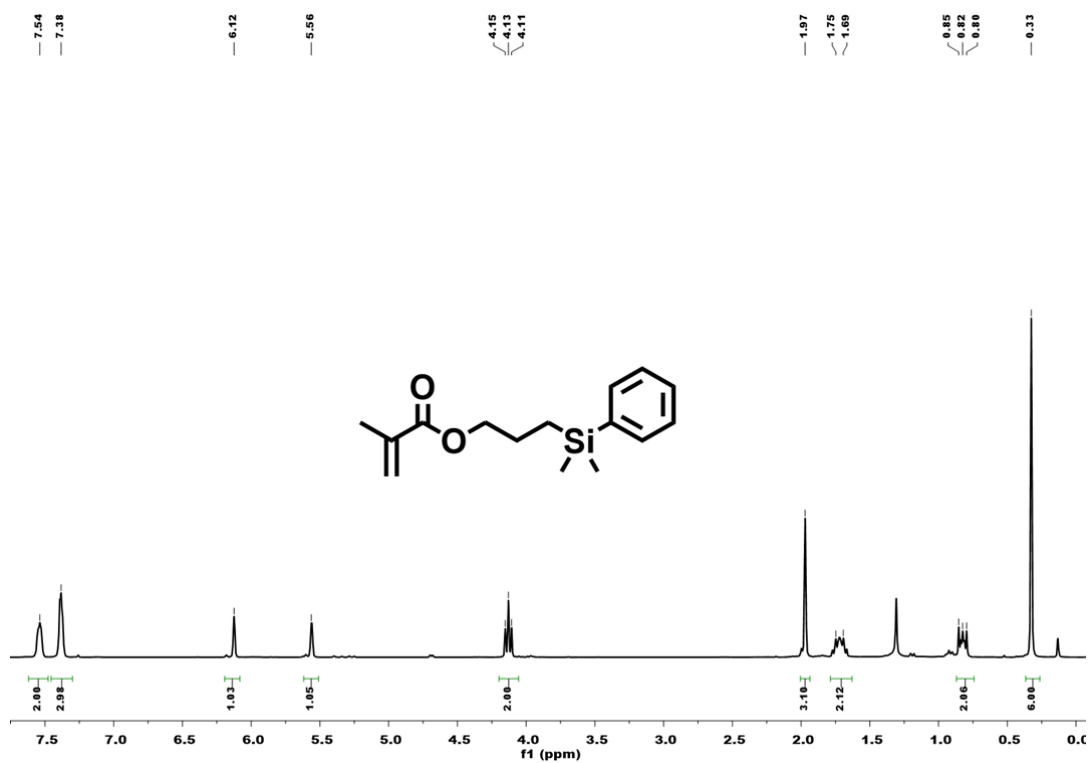

338

339 **Supplementary Figure 49.** <sup>1</sup>H-NMR of compound 13

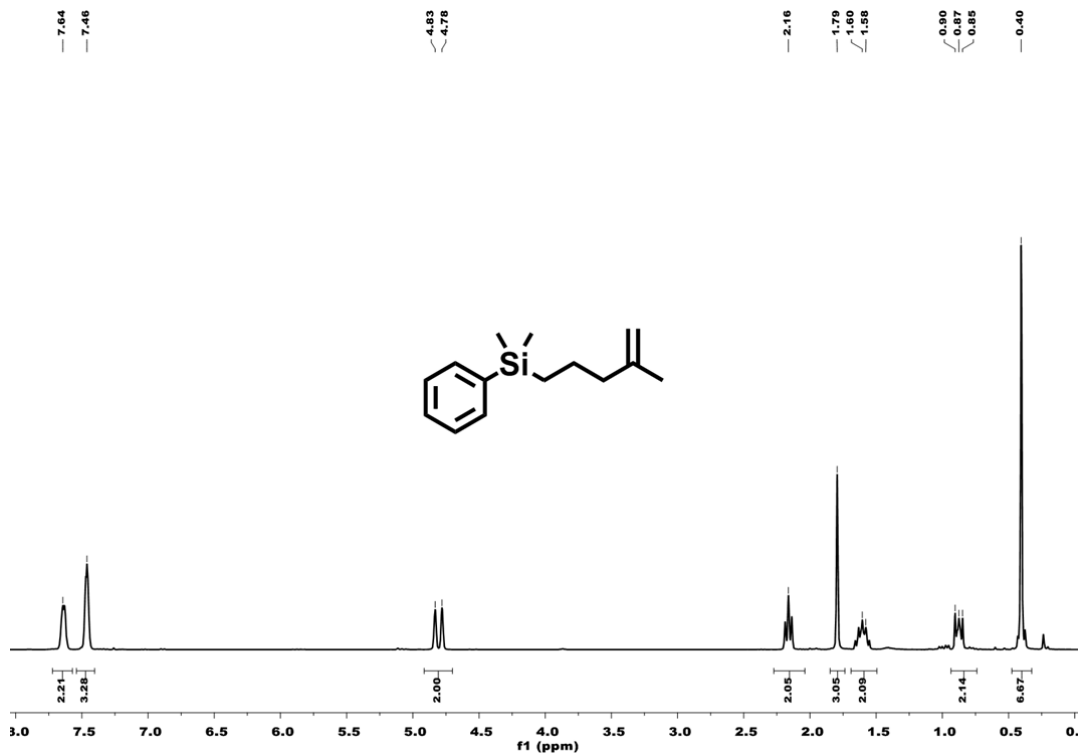

340

341 **Supplementary Figure 50.**  $^1\text{H-NMR}$  of compound 14

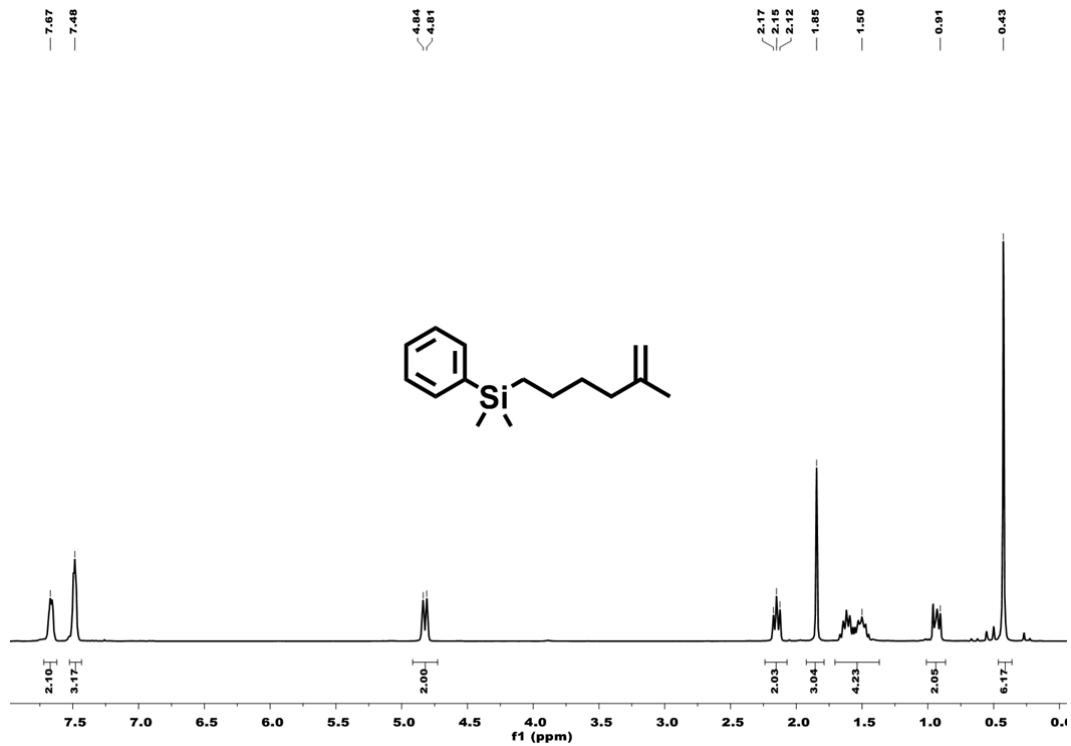

342

343 **Supplementary Figure 51.**  $^1\text{H-NMR}$  of compound 15

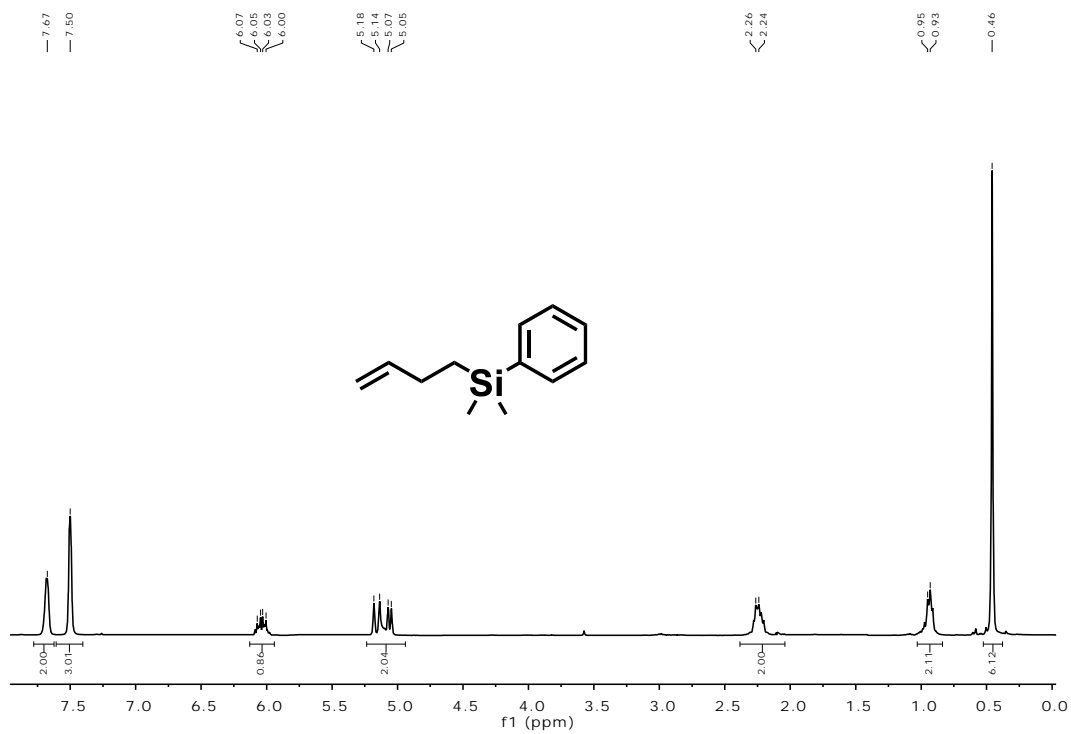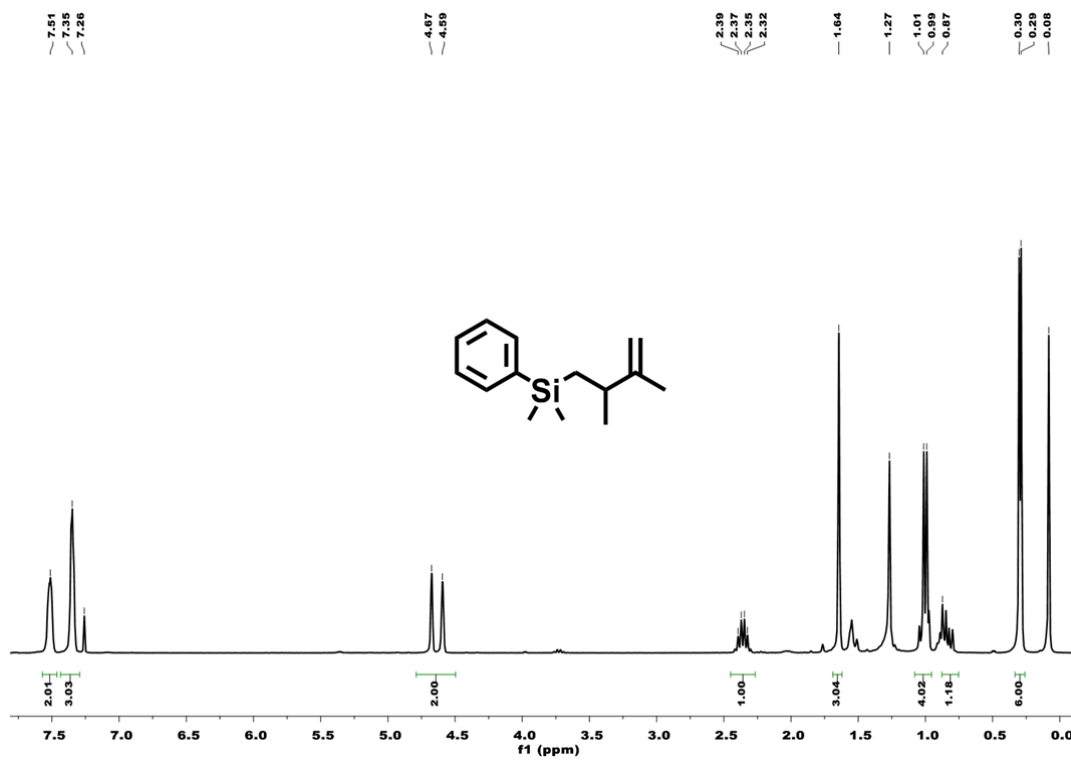

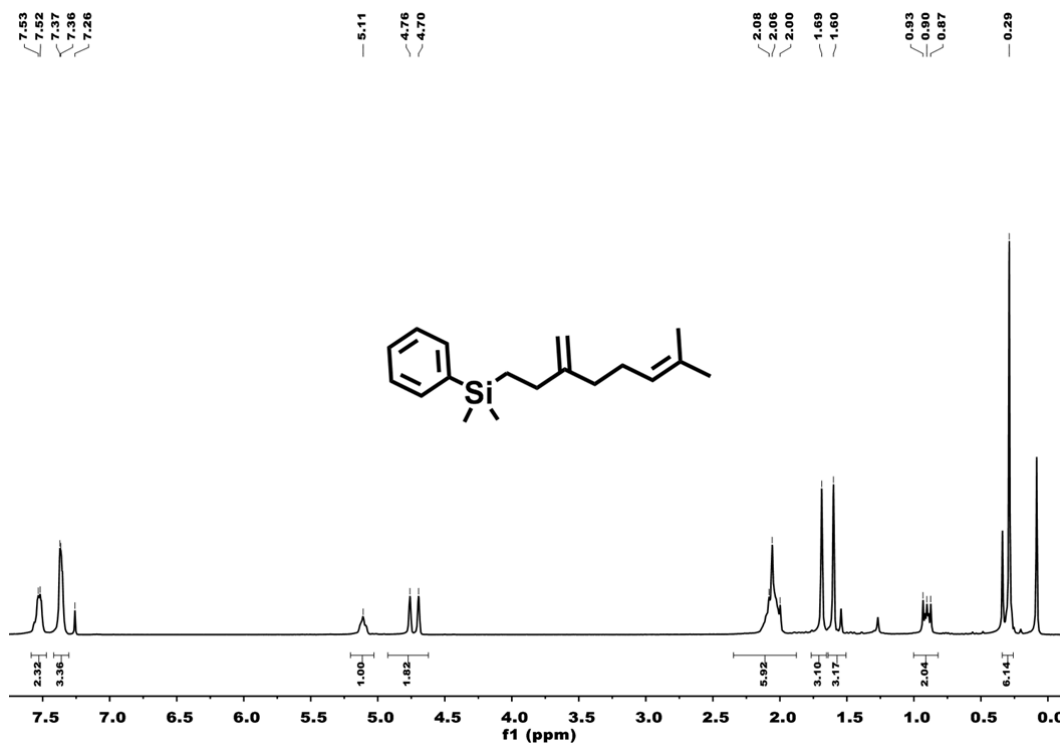

350 **Supplementary Figure 54.**  $^1\text{H-NMR}$  of compound **18**

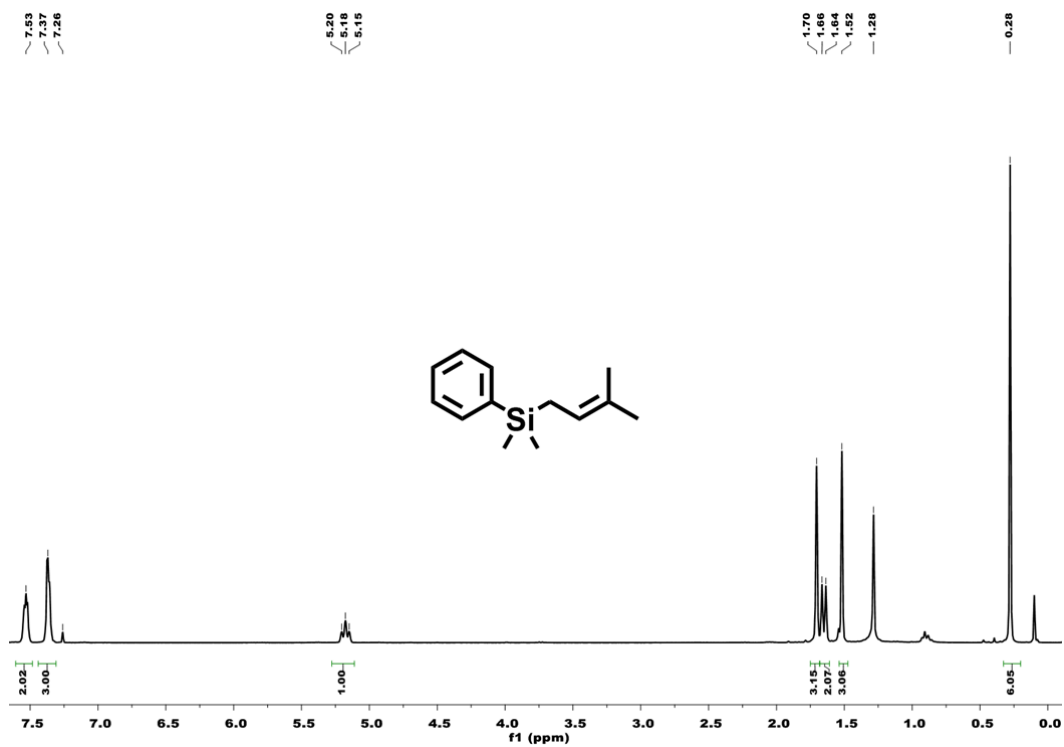

352 **Supplementary Figure 55.**  $^1\text{H-NMR}$  of compound **19**

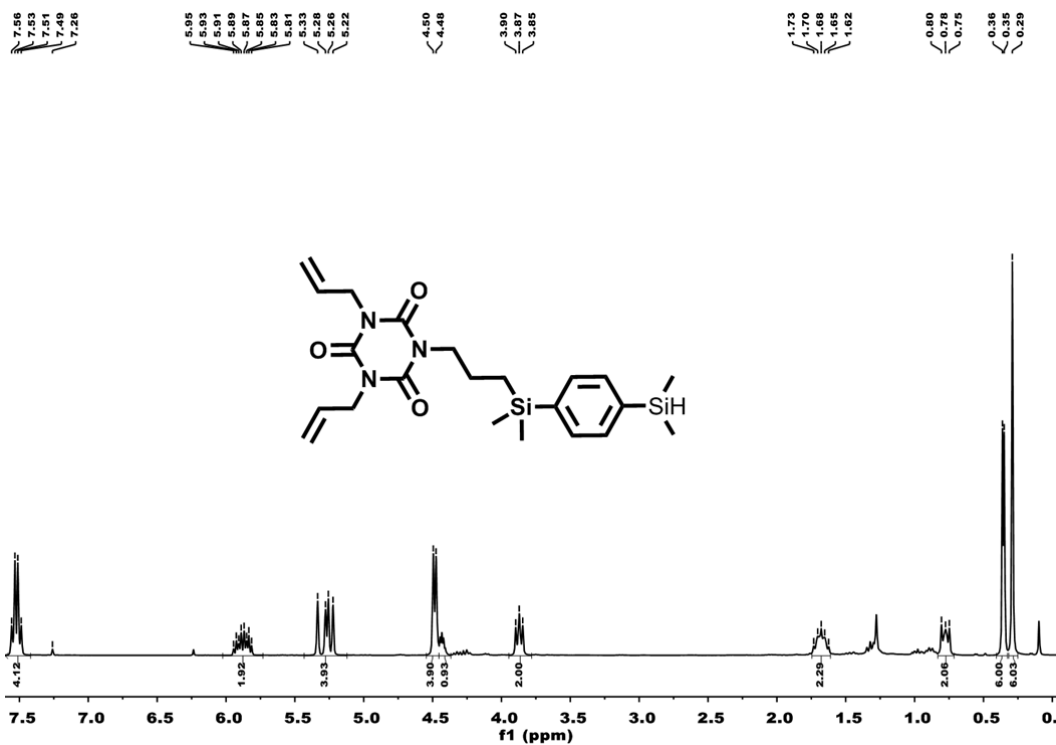

353

354 **Supplementary Figure 56.** <sup>1</sup>H-NMR of compound 20

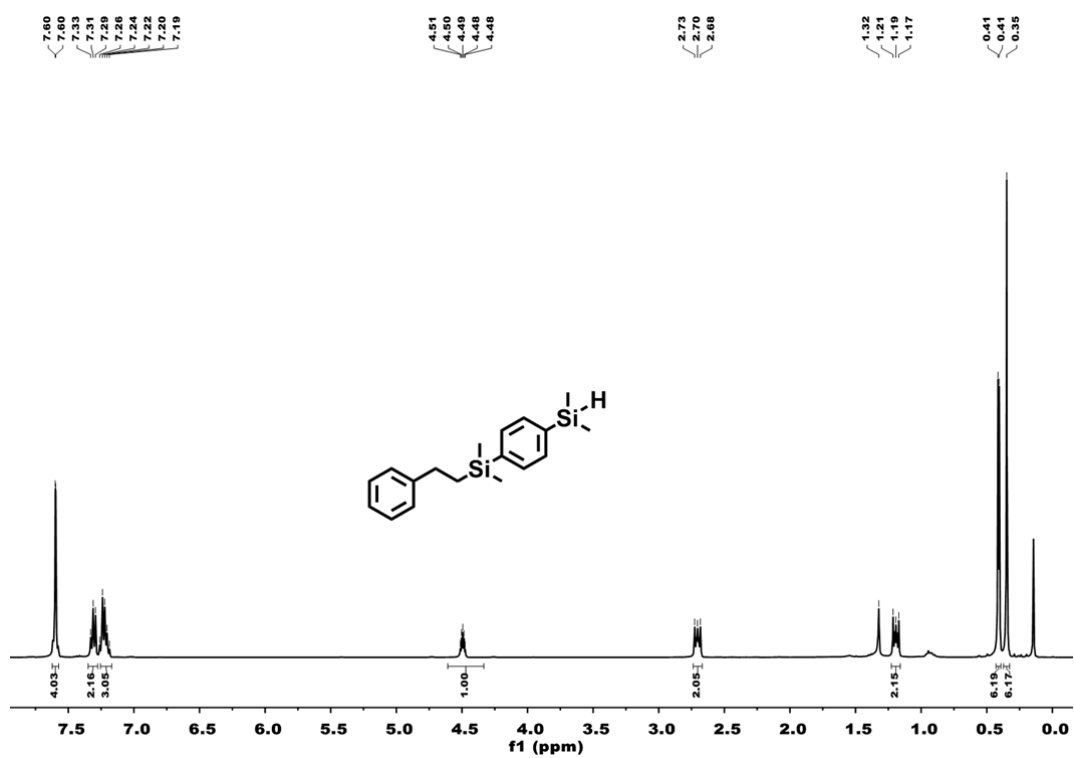

355

356 **Supplementary Figure 57.** <sup>1</sup>H-NMR of compound 21



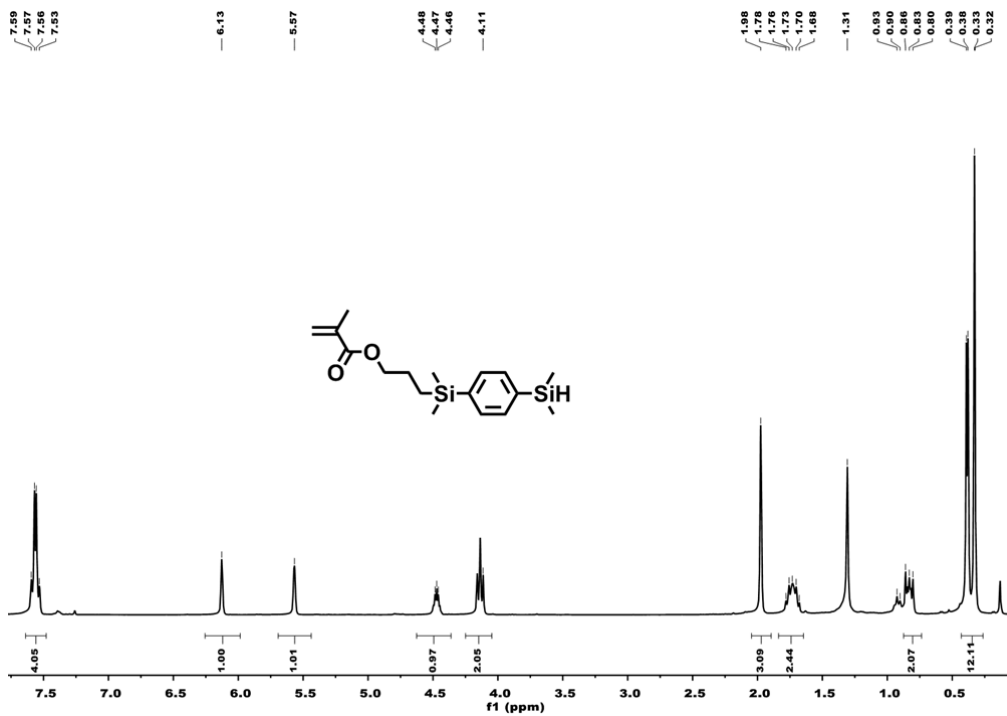

357

358 **Supplementary Figure 58** <sup>1</sup>H-NMR of compound 22

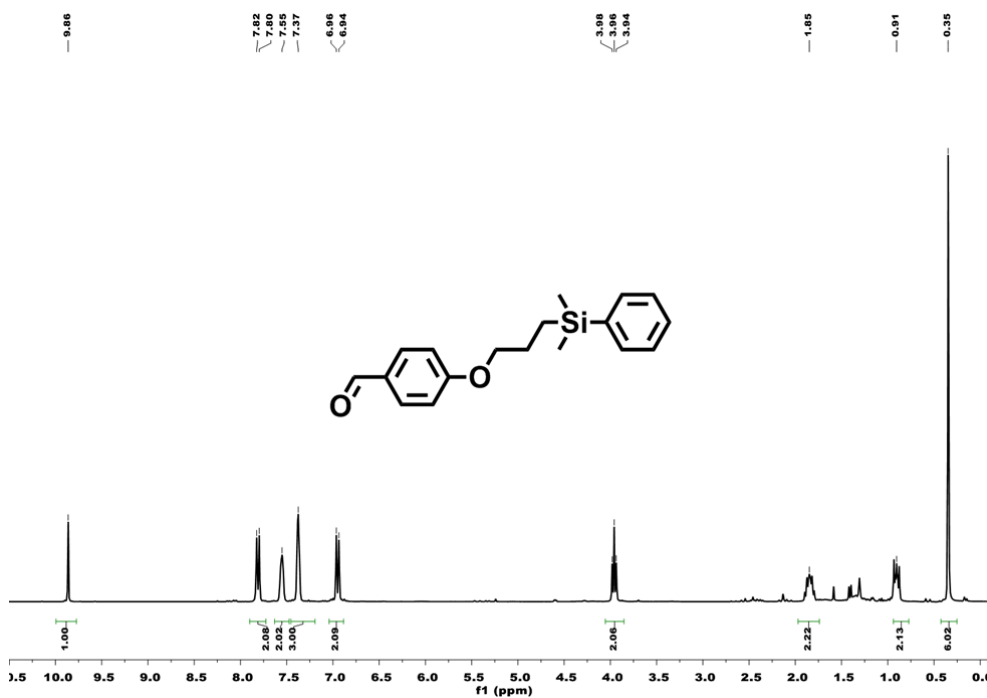

359

360 **Supplementary Figure 59.** <sup>1</sup>H-NMR of compound 23

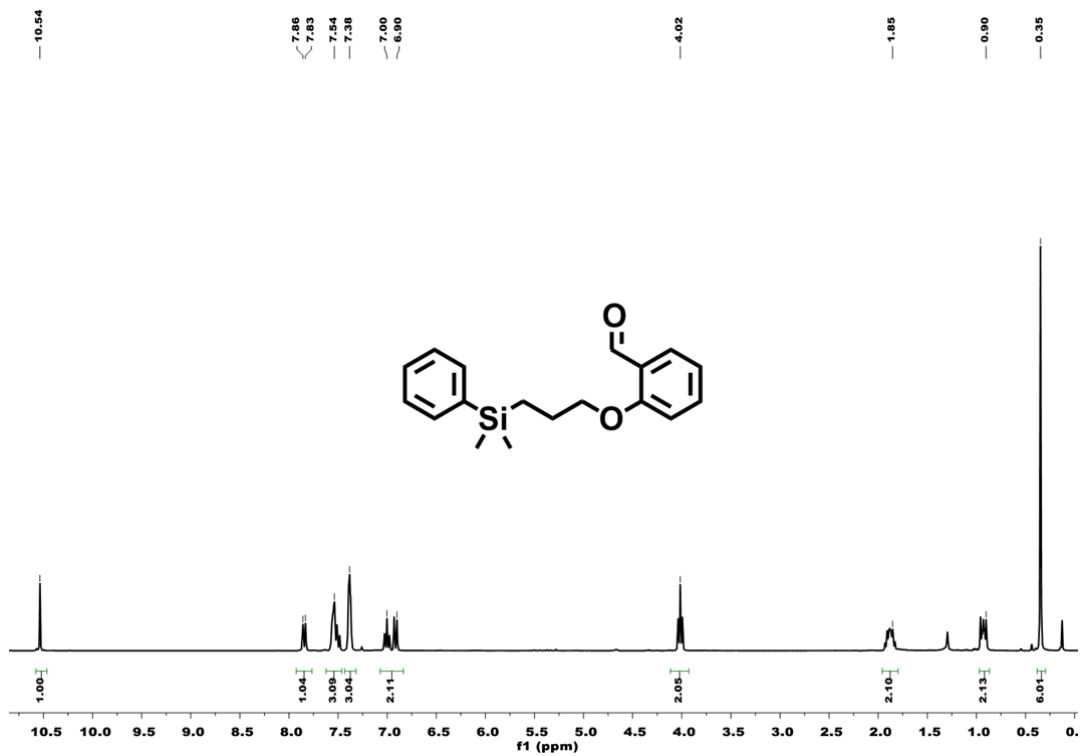

361

362 **Supplementary Figure 60.** <sup>1</sup>H-NMR of compound 24

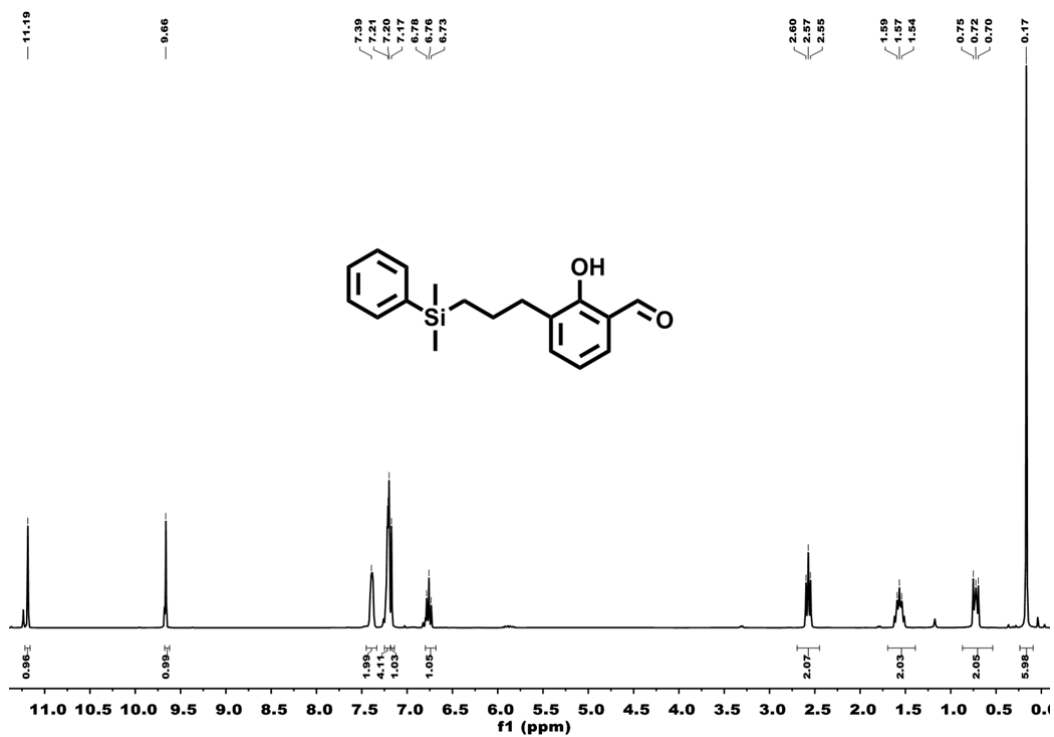

363

364 **Supplementary Figure 61.** <sup>1</sup>H-NMR of compound 25

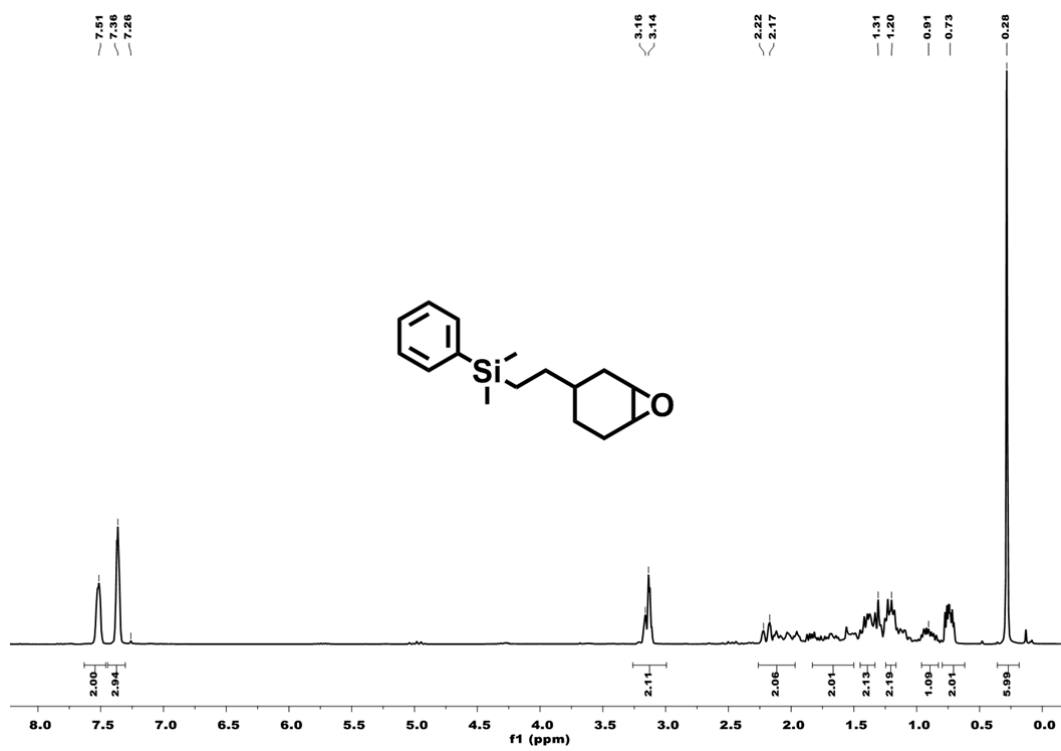

365

366 **Supplementary Figure 62.** <sup>1</sup>H-NMR of compound 26

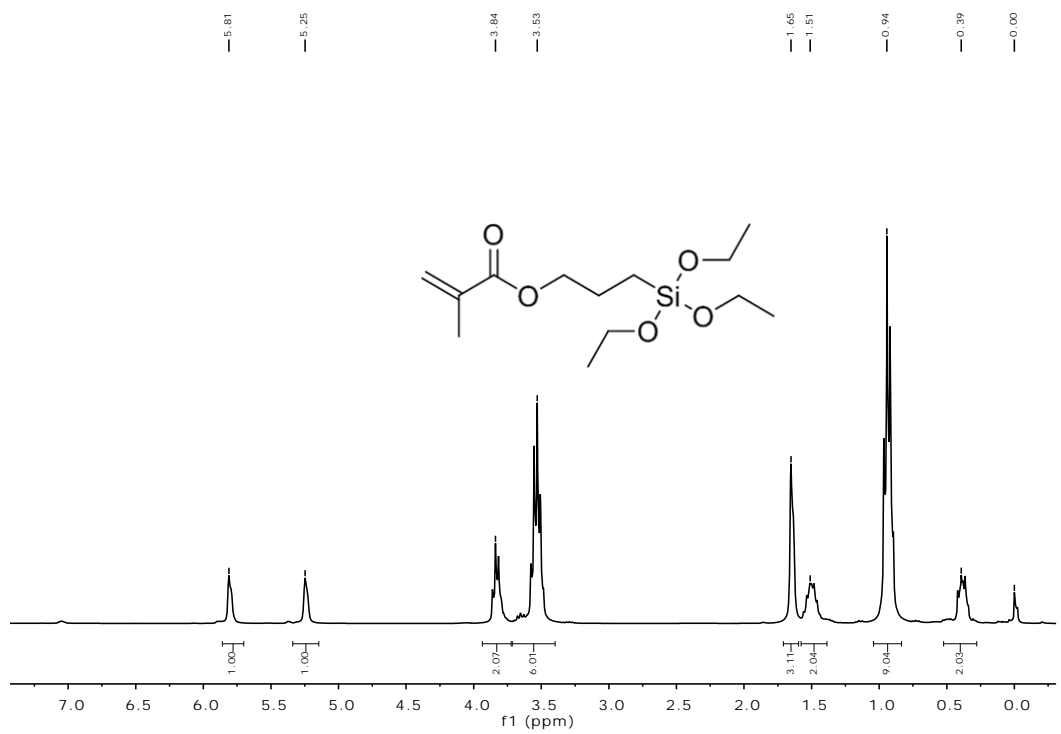

367

368

369 **Supplementary Figure 63.** <sup>1</sup>H-NMR of compound 27

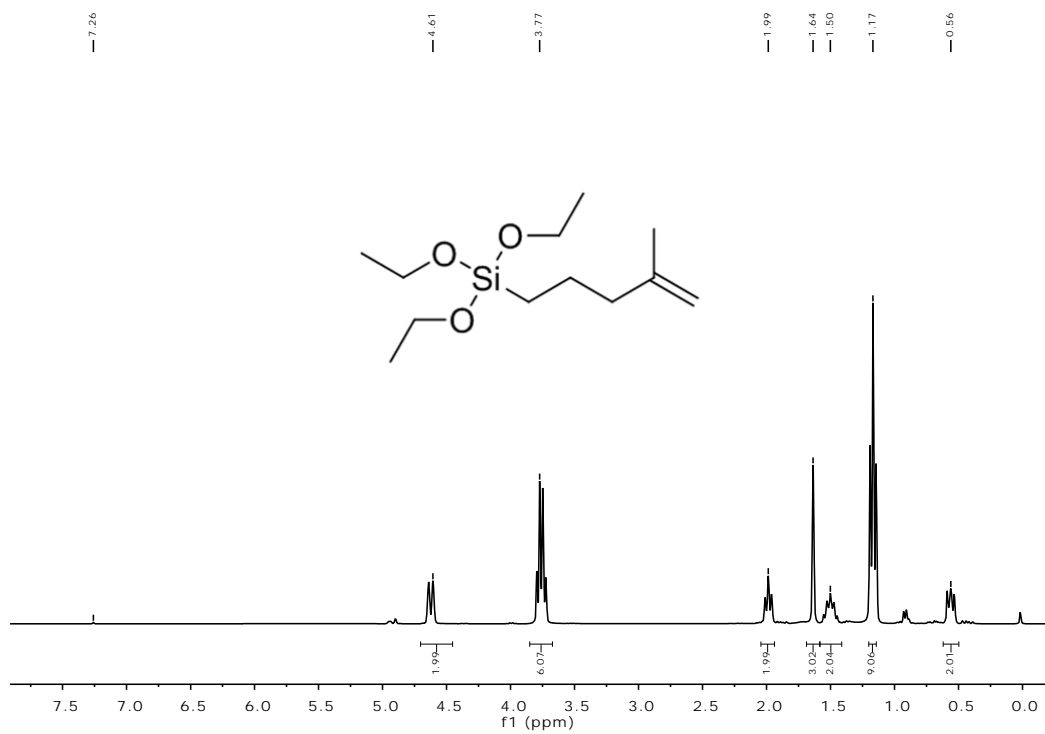

370

371

372 **Supplementary Figure 64.** <sup>1</sup>H-NMR of compound 28

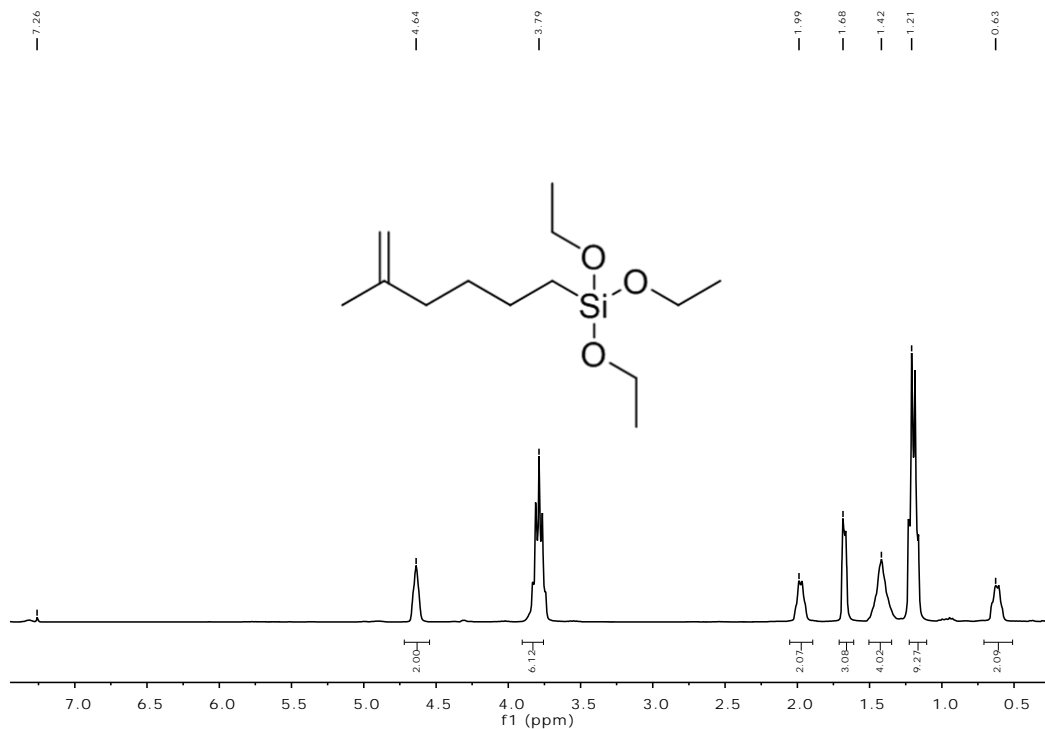

373

374

375 **Supplementary Figure 65.** <sup>1</sup>H-NMR of compound 29

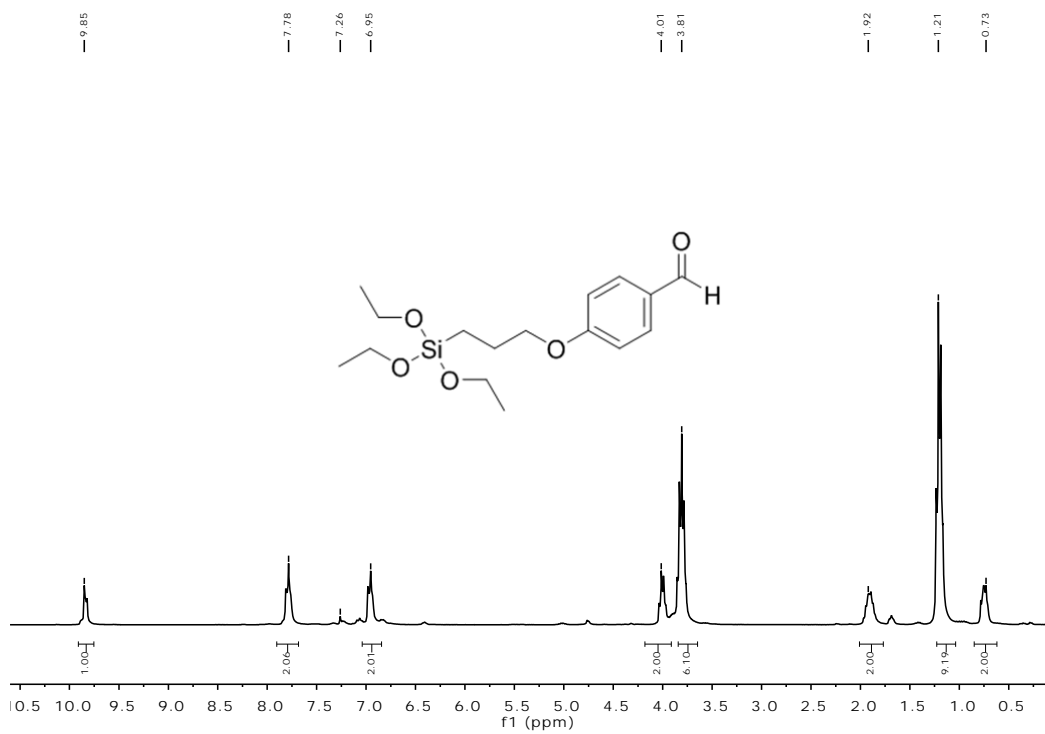

376

377

378 **Supplementary Figure 66.**  $^1\text{H-NMR}$  of compound **30**

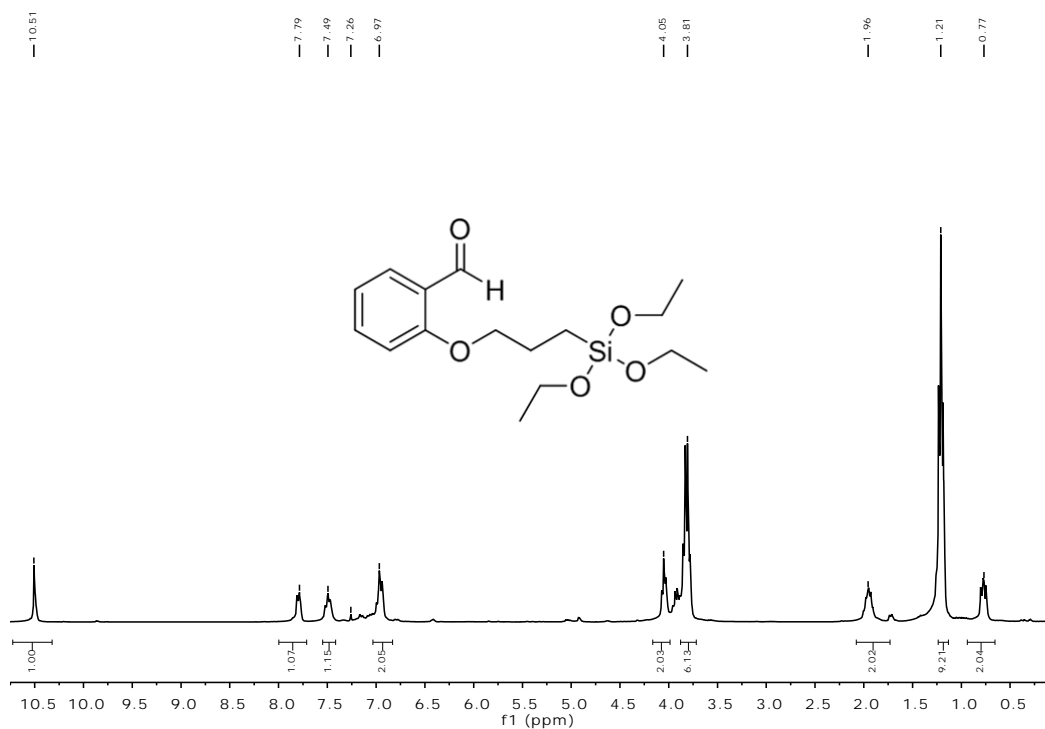

379

380

381 **Supplementary Figure 67.**  $^1\text{H-NMR}$  of compound **31**

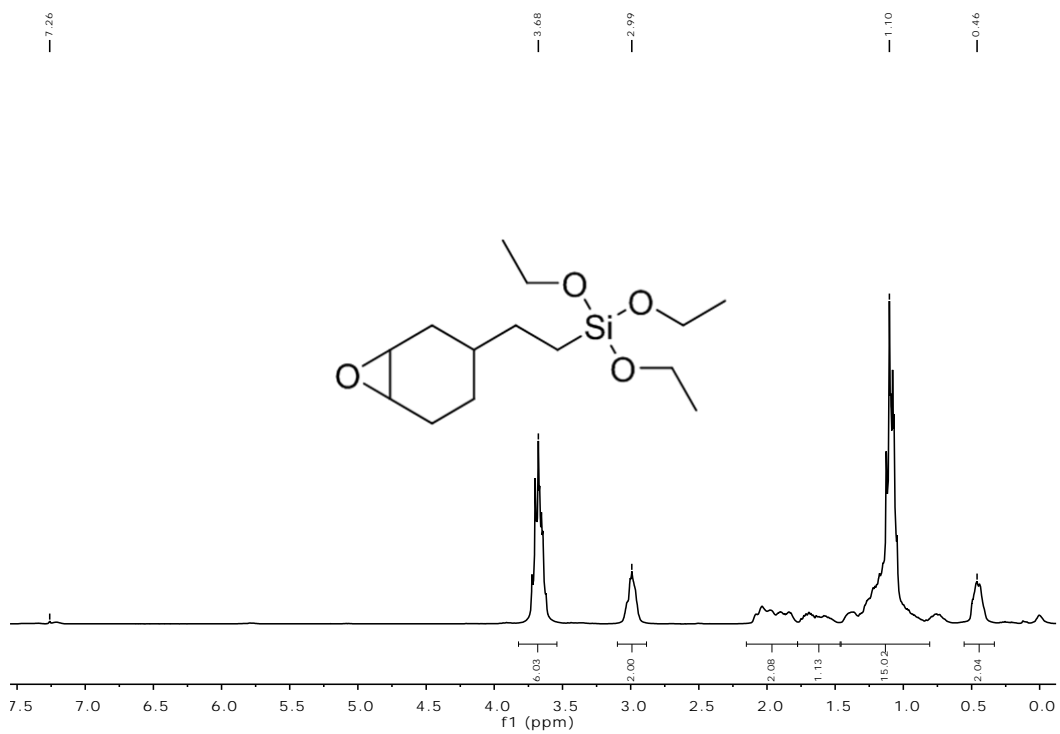

383 **Supplementary Figure 68.**  $^1\text{H-NMR}$  of compound **32**

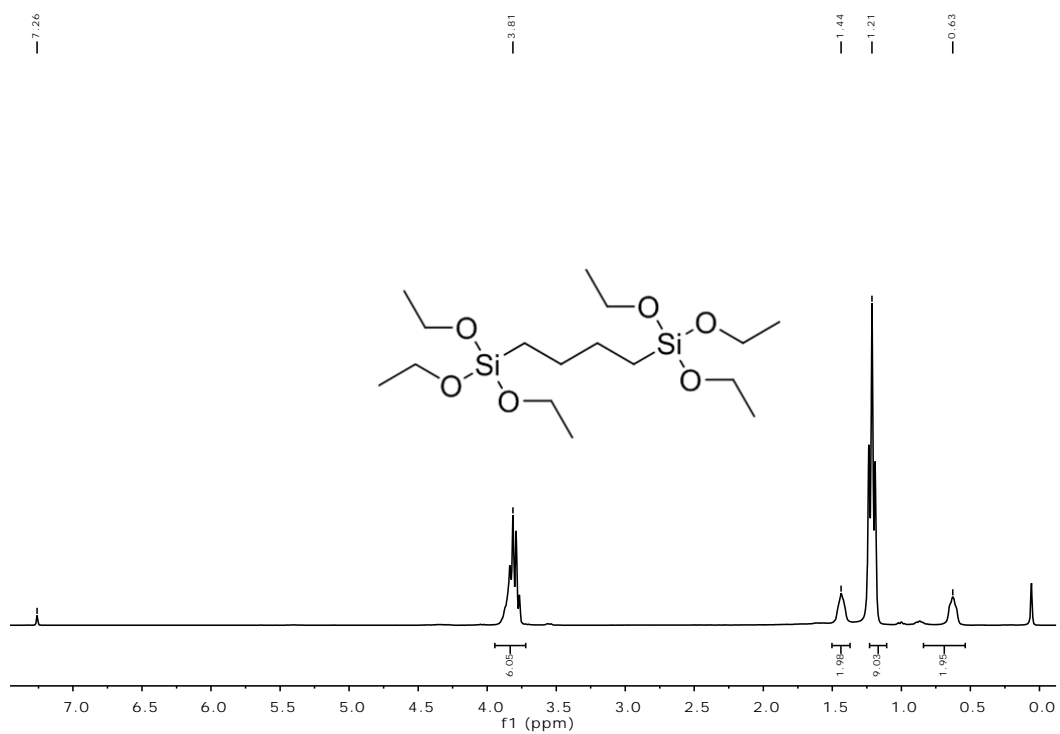

385 **Supplementary Figure 69.**  $^1\text{H-NMR}$  of compound **33**

386

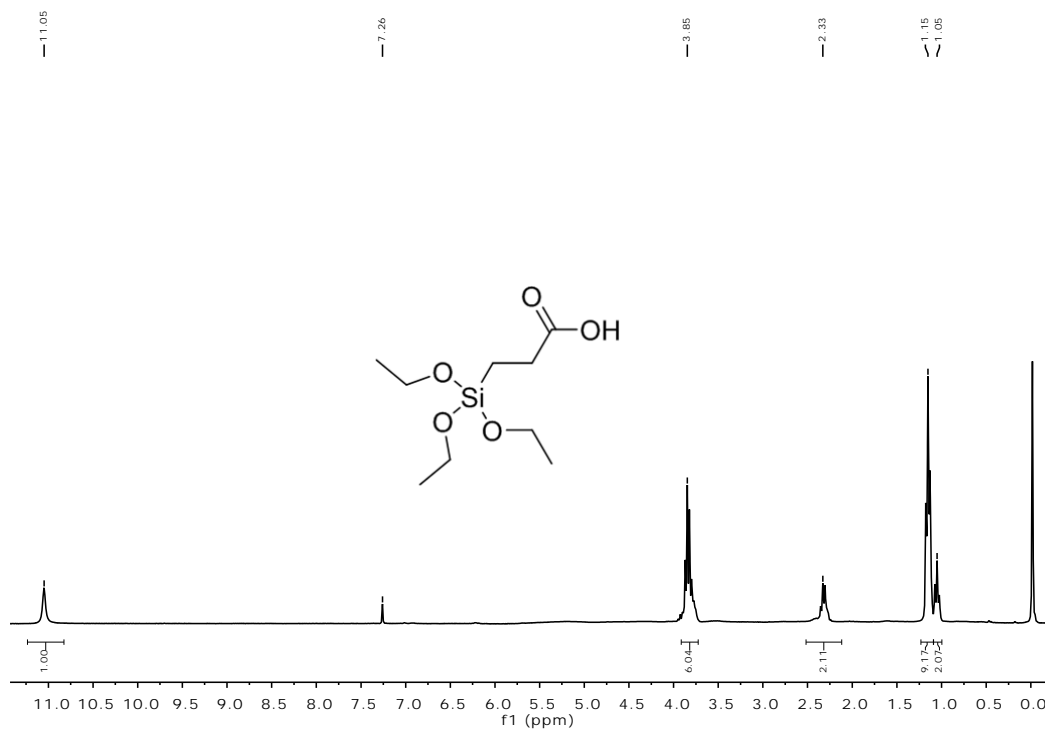

387

388 **Supplementary Figure 70.**  $^1\text{H-NMR}$  of compound **34**

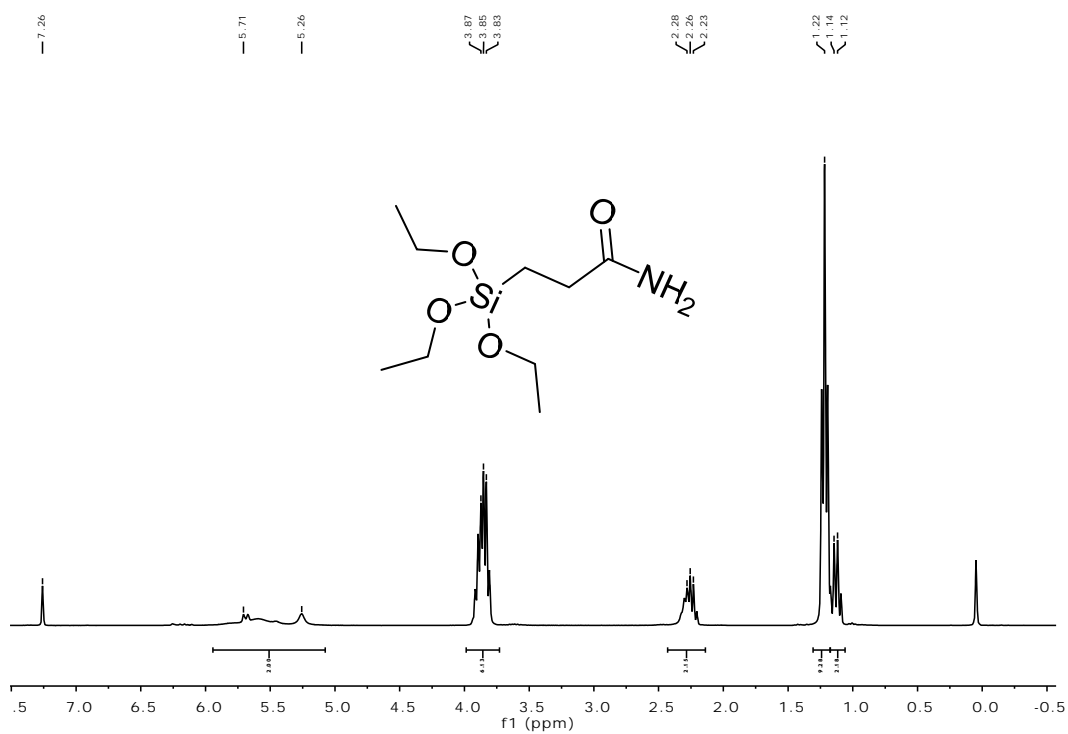

389

390 **Supplementary Figure 71.**  $^1\text{H-NMR}$  of compound **35**

391

## 392 Supplementary References

- 393 1. Tugcu, N., Park, S. K., Moore, J. A. & Cramer, S. M. Synthesis and characterization of high-affinity,  
394 low-molecular-mass displacers for anion-exchange chromatography. *Ind. Eng. Chem. Res.* **41**, 6482–6492  
395 (2002).
- 396 2. Rathore, R. C. & Burns, L. Preparation of hexakis(4 - Bromophenyl) Benzene (HBB) [1,1':2',1''-Terphenyl,  
397 4,4''-dibromo - 3',4',5',6'-tetrakis(4-bromophenyl)-]. *Org. Synth.* **82**, 30–33 (2005).
- 398 3. Kojima, T. & Hiraoka, S. Selective alternate derivatization of the hexaphenylbenzene framework through a  
399 thermodynamically controlled halogen dance. *Org. Lett.* **16**,1024–1027 (2014).
- 400 4. Furukawa, H. et al. Ultrahigh porosity in metal-organic frameworks. *Science* **329**, 424–428 (2010).
- 401 5. Hiraoka, S., Yamauchi, Y. Arakane, R. & Shionoya, M. Template-directed synthesis of a covalent organic  
402 capsule based on a 3 nm-sized metallocapsule. *J. Am. Chem. Soc.* **131**, 11646–11647 (2009).
- 403 6. Prakash, M. J. et al. Metal–organic polyhedron based on a CuII paddle-wheel secondary building unit at the  
404 truncated octahedron corners. *Inorg. Chem.* **48**, 1281–1283 (2009).
- 405 7. Willems, T. F., Rycroft, C. H., Kazi, M., Meza, J. C. & Haranczyk, M. Algorithms and tools for high-throughput  
406 geometry-based analysis of crystalline porous materials. *Microporous and Mesoporous Materials* **149**,  
407 134–141 (2012).
- 408 8. Wang, S. et al. Ultrafine Pt nanoclusters confined in a calixarene-based {Ni<sub>24</sub>} coordination cage for  
409 high-efficient hydrogen evolution reaction. *J. Am. Chem. Soc.* **138**, 16236–16239 (2016).
- 410 9. Albano, V. G., Natile, G. & Panunzi, A. Five-coordinate alkene complexes of palladium (II) and platinum (II).  
411 *Coordin. Chem. Rev.* **133**, 67–114 (1994)
- 412 10. Ahn, C.C.& Krivanek, O.L. *EELS Atlas: A Reference Guide of Electron Energy Loss Spectra Covering All*  
413 *Stable Elements*, Gatan Inc., Warrendale, 1983.
- 414 11. Chen, Y., Ji, S., Sun, W., Chen, W., Dong, J., Wen, J., Zhang, J., Li, Z., Zheng, L., Chen, C., Peng, Q., Wang, D.  
415 & Li, Y. Discovering partially charged single-Atom Pt for enhanced anti-Markovnikov alkene hydrosilylation.  
416 *J. Am. Chem. Soc.* **140**, 7407–7410 (2018)
