# Supplementary material for: Biomimetic caged platinum catalyst for hydrosilylation reaction with high site selectivity
Source: PubMed Central journal article supplement (PMC7782696; doi:10.1038/s41467-020-20233-w), 2021-01-04
Supplement: 41467_2020_20233_MOESM3_ESM.pdf [file 41467_2020_20233_MOESM3_ESM.pdf]

## Description of Additional Supplementary Files

File Name: Supplementary Movie 1

Description: The rotating structural model of **MOP1**

File Name: Supplementary Movie 2

Description: The rotating structural model of **COP1-T-Pt.**
